# Supplementary material for: A highly efficient heterogeneous copper-catalyzed Chan–Lam coupling reaction of sulfonyl azides with arylboronic acids leading to N-arylsulfonamides
Source: Royal Society of Chemistry journal article supplement (doi:10.1039/c6ra04298h), 2016-01-01
Supplement: c6ra04298h1.pdf [file c6ra04298h1.pdf]

## Supporting information:

### **A highly efficient heterogeneous copper-catalyzed Chan-Lam coupling reaction of sulfonyl azides with arylboronic acids leading to *N*-arylsulfonamides**

Chongren You<sup>a</sup>, Fang Yao<sup>b</sup>, Tao Yan<sup>a</sup> and Mingzhong Cai<sup>a\*</sup>

<sup>a</sup> *Key Laboratory of Functional Small Organic Molecule, Ministry of Education and College of Chemistry & Chemical Engineering, Jiangxi Normal University, Nanchang 330022, P. R. China*

<sup>b</sup> *College of Chemical and Material Engineering, Quzhou University, Quzhou 324000, P. R. China*

Fax: (+86)-791-8812-0388; E-mail: mzcai@jxnu.edu.cn

#### **The spectral data of *N*-arylsulfonamides 3a-3c':**

**4-Methyl-*N*-phenylbenzenesulfonamide 3a.**<sup>1</sup> White solid, mp 102-103 °C. <sup>1</sup>H NMR (400 MHz, CDCl<sub>3</sub>): δ 7.69 (d, *J* = 8.0 Hz, 2H), 7.25-7.19 (m, 5H), 7.10-7.06 (m, 3H), 2.36 (s, 3H); <sup>13</sup>C NMR (100 MHz, CDCl<sub>3</sub>): δ 143.9, 136.6, 136.0, 129.7, 129.3, 127.3, 125.2, 121.4, 21.5.

**4-Methyl-*N*-(*p*-tolyl)benzenesulfonamide 3b.**<sup>1</sup> White solid, mp 116-117 °C. <sup>1</sup>H NMR (400 MHz, CDCl<sub>3</sub>): δ 7.65 (d, *J* = 8.0 Hz, 2H), 7.20 (d, *J* = 7.6 Hz, 2H), 7.03-6.94 (m, 5H), 2.36 (s, 3H), 2.26 (s, 3H); <sup>13</sup>C NMR (100 MHz, CDCl<sub>3</sub>): δ 143.7, 136.1, 135.3, 133.8, 129.8, 129.6, 127.3, 122.2, 21.5, 20.8.

***N*-(4-Methoxyphenyl)-4-methylbenzenesulfonamide 3c.**<sup>1</sup> White solid, mp 113-114

°C. <sup>1</sup>H NMR (400 MHz, CDCl<sub>3</sub>): δ 7.61 (d, *J* = 8.0 Hz, 2H), 7.19 (d, *J* = 8.0 Hz, 2H), 7.10 (s, 1H), 6.99 (d, *J* = 9.2 Hz, 2H), 6.73 (d, *J* = 8.8 Hz, 2H), 3.73 (s, 3H), 2.36 (s, 3H); <sup>13</sup>C NMR (100 MHz, CDCl<sub>3</sub>): δ 157.8, 143.7, 136.0, 129.6, 129.1, 127.3, 125.2, 114.4, 55.4, 21.5.

***N*-(4-Chlorophenyl)-4-methylbenzenesulfonamide 3d.**<sup>1</sup> Pale yellow solid, mp 118-119 °C. <sup>1</sup>H NMR (400 MHz, CDCl<sub>3</sub>): δ 7.68 (d, *J* = 8.4 Hz, 2H), 7.49 (s, 1H), 7.23 (d, *J* = 8.4 Hz, 2H), 7.17 (d, *J* = 8.8 Hz, 2H), 7.04 (d, *J* = 8.8 Hz, 2H), 2.37 (s, 3H); <sup>13</sup>C NMR (100 MHz, CDCl<sub>3</sub>): δ 144.2, 135.6, 135.2, 130.8, 129.8, 129.4, 127.3, 122.8, 21.6.

***N*-(4-Bromophenyl)-4-methylbenzenesulfonamide 3e.**<sup>2</sup> Pale yellow solid, mp 146-148 °C. <sup>1</sup>H NMR (400 MHz, CDCl<sub>3</sub>): δ 7.73 (s, 1H), 7.70 (d, *J* = 7.6 Hz, 2H), 7.29 (d, *J* = 8.0 Hz, 2H), 7.21 (d, *J* = 8.0 Hz, 2H), 6.99 (d, *J* = 8.0 Hz, 2H), 2.35 (s, 3H); <sup>13</sup>C NMR (100 MHz, CDCl<sub>3</sub>): δ 144.2, 135.9, 135.7, 132.3, 129.8, 127.3, 122.9, 118.3, 21.6.

***N*-(4-Fluorophenyl)-4-methylbenzenesulfonamide 3f.** White solid, mp 79-80 °C. <sup>1</sup>H NMR (400 MHz, CDCl<sub>3</sub>): δ 7.65 (d, *J* = 6.8 Hz, 2H), 7.44 (m, 1H), 7.22 (d, *J* = 7.6 Hz, 2H), 7.07 (m, 2H), 6.91 (t, *J* = 7.6 Hz, 2H), 2.37 (s, 3H); <sup>13</sup>C NMR (100 MHz, CDCl<sub>3</sub>): δ 160.8 (d, <sup>1</sup>*J*<sub>C-F</sub> = 249.9 Hz), 144.1, 135.6, 132.4 (d, <sup>4</sup>*J*<sub>C-F</sub> = 2.2 Hz), 129.7, 127.3, 122.4 (d, <sup>3</sup>*J*<sub>C-F</sub> = 8.4 Hz), 116.1 (d, <sup>2</sup>*J*<sub>C-F</sub> = 22.6 Hz), 21.6. Anal. Calcd. for C<sub>13</sub>H<sub>12</sub>FNO<sub>2</sub>S: C, 58.85; H, 4.56; N, 5.28; S, 12.09. Found: C, 58.59; H, 4.37; N, 5.45; S, 11.84.

***N*-(Biphenyl-4-yl)-4-methylbenzenesulfonamide 3g.** White solid, mp 157-158 °C.

<sup>1</sup>H NMR (400 MHz, CDCl<sub>3</sub>): δ 7.73 (d, *J* = 7.6 Hz, 2H), 7.49 (d, *J* = 7.6 Hz, 2H), 7.44 (d, *J* = 8.4 Hz, 2H), 7.41-7.36 (m, 3H), 7.30 (t, *J* = 7.2 Hz, 1H), 7.22 (d, *J* = 7.6 Hz, 2H), 7.16 (d, *J* = 8.0 Hz, 2H), 2.35 (s, 3H); <sup>13</sup>C NMR (100 MHz, CDCl<sub>3</sub>): δ 144.0, 140.1, 138.1, 136.2, 135.9, 129.7, 128.8, 127.9, 127.4, 127.3, 126.8, 121.7, 21.5. Anal. Calcd. for C<sub>19</sub>H<sub>17</sub>NO<sub>2</sub>S: C, 70.56; H, 5.30; N, 4.33; S, 9.91. Found: C, 70.37; H, 5.48; N, 4.16; S, 9.66.

***N*-(3-Methoxyphenyl)-4-methylbenzenesulfonamide 3h.**<sup>3</sup> White solid, mp 86-87 °C.

<sup>1</sup>H NMR (400 MHz, CDCl<sub>3</sub>): δ 7.73 (d, *J* = 8.0 Hz, 2H), 7.65 (s, 1H), 7.19 (d, *J* = 8.0 Hz, 2H), 7.08 (t, *J* = 8.4 Hz, 1H), 6.73 (s, 1H), 6.67 (d, *J* = 7.6 Hz, 1H), 6.59 (d, *J* = 8.4 Hz, 1H), 3.69 (s, 3H), 2.33 (s, 3H); <sup>13</sup>C NMR (100 MHz, CDCl<sub>3</sub>): δ 160.2, 143.9, 138.0, 136.0, 130.0, 129.7, 127.3, 113.1, 110.7, 106.6, 55.3, 21.5.

***N*-(3,5-Dimethylphenyl)-4-methylbenzenesulfonamide 3i.**<sup>3</sup> White solid, mp 90-91

°C. NMR (400 MHz, CDCl<sub>3</sub>): δ 7.71 (d, *J* = 7.6 Hz, 2H), 7.26 (s, 1H), 7.21 (d, *J* = 7.6 Hz, 2H), 6.72 (s, 2H), 6.70 (s, 1H), 2.35 (s, 3H), 2.19 (s, 6H); <sup>13</sup>C NMR (100 MHz, CDCl<sub>3</sub>): δ 143.7, 139.0, 136.5, 136.3, 129.6, 127.3, 126.8, 118.8, 21.5, 21.2.

**4-Methyl-*N*-(4-vinylphenyl)benzenesulfonamide 3j.**<sup>3</sup> White solid, mp 80-82 °C. <sup>1</sup>H

NMR (400 MHz, CDCl<sub>3</sub>): δ 7.65 (d, *J* = 6.4 Hz, 2H), 7.29-7.21 (m, 4H), 7.02 (d, *J* = 6.4 Hz, 2H), 6.68-6.58 (m, 2H), 5.66 (d, *J* = 16.8 Hz, 1H), 5.20 (d, *J* = 10.8 Hz, 1H), 2.38 (s, 3H); <sup>13</sup>C NMR (100 MHz, CDCl<sub>3</sub>): δ 144.0, 136.0, 135.9, 135.8, 134.8, 129.7, 127.3, 127.2, 121.6, 113.8, 21.5.

**4-Methyl-*N*-(*o*-tolyl)benzenesulfonamide 3k.**<sup>1</sup> White solid, mp 105-107 °C. <sup>1</sup>H

NMR (400 MHz, CDCl<sub>3</sub>): δ 7.62 (d, *J* = 8.0 Hz, 2H), 7.31 (d, *J* = 8.0 Hz, 1H), 7.21 (d,

$J = 8.0$  Hz, 2H), 7.14-7.07 (m, 3H), 6.61 (s, 1H), 2.38 (s, 3H), 2.01 (s, 3H);  $^{13}\text{C}$  NMR (100 MHz,  $\text{CDCl}_3$ ):  $\delta$  143.8, 136.7, 134.5, 131.4, 130.8, 129.6, 127.2, 126.9, 126.2, 124.3, 21.5, 17.6.

***N*-(2-Methoxyphenyl)-4-methylbenzenesulfonamide 3l.**<sup>2</sup> White solid, mp 125-126 °C.  $^1\text{H}$  NMR (400 MHz,  $\text{CDCl}_3$ ):  $\delta$  7.64 (d,  $J = 8.0$  Hz, 2H), 7.52 (d,  $J = 8.0$  Hz, 1H), 7.18 (d,  $J = 8.0$  Hz, 2H), 7.04-7.00 (m, 2H), 6.89 (t,  $J = 7.6$  Hz, 1H), 6.73 (d,  $J = 8.0$  Hz, 1H), 3.64 (s, 3H), 2.35 (s, 3H);  $^{13}\text{C}$  NMR (100 MHz,  $\text{CDCl}_3$ ):  $\delta$  149.4, 143.6, 136.3, 129.3, 127.3, 126.0, 125.2, 121.1, 121.0, 110.6, 55.6, 21.5.

**4-Methyl-*N*-(naphthalen-1-yl)benzenesulfonamide 3m.**<sup>1</sup> White solid, mp 141-142 °C.  $^1\text{H}$  NMR (400 MHz,  $\text{CDCl}_3$ ):  $\delta$  7.88 (d,  $J = 7.6$  Hz, 1H), 7.78 (d,  $J = 6.8$  Hz, 1H), 7.70-7.63 (m, 3H), 7.43-7.25 (m, 5H), 7.13 (d,  $J = 8.0$  Hz, 2H), 2.31 (s, 3H);  $^{13}\text{C}$  NMR (100 MHz,  $\text{CDCl}_3$ ):  $\delta$  143.8, 136.4, 134.2, 131.5, 129.6, 128.9, 128.4, 127.4, 127.1, 126.6, 126.3, 125.4, 122.6, 121.6, 21.5.

**4-Methyl-*N*-(naphthalen-2-yl)benzenesulfonamide 3n.**<sup>3</sup> White solid, mp 157-158 °C.  $^1\text{H}$  NMR (400 MHz,  $\text{CDCl}_3$ ):  $\delta$  7.75-7.68 (m, 5H), 7.61 (s, 1H), 7.56 (s, 1H), 7.43-7.36 (m, 2H), 7.26 (d,  $J = 8.8$  Hz, 1H), 7.16 (d,  $J = 7.6$  Hz, 2H), 2.30 (s, 3H);  $^{13}\text{C}$  NMR (100 MHz,  $\text{CDCl}_3$ ):  $\delta$  144.0, 135.9, 134.2, 133.7, 131.0, 129.8, 129.4, 127.7, 127.5, 127.3, 126.7, 125.5, 120.9, 118.1, 21.6.

**4-Methyl-*N*-(thiophen-3-yl)benzenesulfonamide 3o.**<sup>3</sup> White solid, mp 110-111 °C.  $^1\text{H}$  NMR (400 MHz,  $\text{CDCl}_3$ ):  $\delta$  7.67 (d,  $J = 8.0$  Hz, 2H), 7.23 (d,  $J = 7.6$  Hz, 2H), 7.16 (t,  $J = 4.0$  Hz, 1H), 7.09 (s, 1H), 6.87-6.83 (m, 2H), 2.38 (s, 3H);  $^{13}\text{C}$  NMR (100 MHz,  $\text{CDCl}_3$ ):  $\delta$  143.9, 136.0, 134.3, 129.6, 127.3, 125.6, 123.3, 113.9, 21.5.

***N*-Phenylmethanesulfonamide 3p.**<sup>4</sup> White solid, mp 99-100 °C. <sup>1</sup>H NMR (400 MHz, CDCl<sub>3</sub>): δ 7.35 (t, *J* = 8.0 Hz, 2H), 7.24 (d, *J* = 8.0 Hz, 2H), 7.19 (t, *J* = 7.4 Hz, 1H), 6.97 (s, 1H), 3.01 (s, 3H); <sup>13</sup>C NMR (100 MHz, CDCl<sub>3</sub>): δ 136.9, 129.7, 125.4, 120.9, 39.2.

***N-p*-Tolylmethanesulfonamide 3q.**<sup>4</sup> White solid, mp 103-104 °C. <sup>1</sup>H NMR (400 MHz, CDCl<sub>3</sub>): δ 7.15 (s, 4H), 7.00 (s, 1H), 2.98 (s, 3H), 2.33 (s, 3H); <sup>13</sup>C NMR (100 MHz, CDCl<sub>3</sub>): δ 135.6, 134.0, 130.2, 121.6, 38.9, 20.9.

***N*-(4-Methoxyphenyl)methanesulfonamide 3r.**<sup>5</sup> White solid, mp 113-114 °C. <sup>1</sup>H NMR (400 MHz, CDCl<sub>3</sub>): δ 7.22 (d, *J* = 8.8 Hz, 2H), 6.93 (br, 1H), 6.88 (d, *J* = 8.8 Hz, 2H), 3.80 (s, 3H), 2.96 (s, 3H); <sup>13</sup>C NMR (100 MHz, CDCl<sub>3</sub>): δ 158.0, 129.2, 124.7, 114.8, 55.5, 38.7.

***N*-(4-Chlorophenyl)methanesulfonamide 3s.**<sup>5</sup> White solid, mp 122-124 °C. <sup>1</sup>H NMR (400 MHz, CDCl<sub>3</sub>): δ 7.32 (d, *J* = 8.8 Hz, 2H), 7.18 (d, *J* = 8.4 Hz, 2H), 6.88 (br, 1H), 3.01 (s, 3H); <sup>13</sup>C NMR (100 MHz, CDCl<sub>3</sub>): δ 135.2, 131.1, 129.8, 122.2, 39.5.

**4-Methoxy-*N*-phenylbenzenesulfonamide 3t.**<sup>6</sup> White solid, mp 107-108 °C. <sup>1</sup>H NMR (400 MHz, CDCl<sub>3</sub>): δ 7.74 (d, *J* = 8.8 Hz, 2H), 7.29 (br, 1H), 7.22 (t, *J* = 8.0 Hz, 2H), 7.11-7.06 (m, 3H), 6.88 (d, *J* = 8.4 Hz, 2H), 3.80 (s, 3H); <sup>13</sup>C NMR (100 MHz, CDCl<sub>3</sub>): δ 163.1, 136.7, 130.5, 129.5, 129.3, 125.2, 121.4, 114.2, 55.6.

**4-Methoxy-*N*-(4-methoxyphenyl)benzenesulfonamide 3u.**<sup>6</sup> White solid, mp 100-101 °C. <sup>1</sup>H NMR (400 MHz, CDCl<sub>3</sub>): δ 7.65 (d, *J* = 9.2 Hz, 2H), 6.99 (d, *J* = 8.8 Hz, 2H), 6.87 (d, *J* = 8.8 Hz, 2H), 6.84 (br, 1H), 6.75 (d, *J* = 8.8 Hz, 2H), 3.82 (s, 3H),

3.75 (s, 3H);  $^{13}\text{C}$  NMR (100 MHz,  $\text{CDCl}_3$ ):  $\delta$  163.0, 157.8, 130.5, 129.5, 129.1, 125.3, 114.4, 114.1, 55.6, 55.4.

***N*-(4-Chlorophenyl)-4-methoxybenzenesulfonamide 3v.** White solid, mp 97-99 °C.

$^1\text{H}$  NMR (400 MHz,  $\text{CDCl}_3$ ):  $\delta$  7.73 (d,  $J = 8.8$  Hz, 2H), 7.47 (s, 1H), 7.18 (d,  $J = 8.8$  Hz, 2H), 7.04 (d,  $J = 8.4$  Hz, 2H), 6.89 (d,  $J = 8.4$  Hz, 2H), 3.82 (s, 3H);  $^{13}\text{C}$  NMR (100 MHz,  $\text{CDCl}_3$ ):  $\delta$  163.3, 135.3, 130.7, 130.0, 129.5, 129.4, 122.8, 114.3, 55.6.

Anal. Calcd. for  $\text{C}_{13}\text{H}_{12}\text{ClNO}_3\text{S}$ : C, 52.44; H, 4.06; N, 4.70; S, 10.77. Found: C, 52.57; H, 4.25; N, 4.53; S, 10.56.

**4-Nitro-*N*-phenylbenzenesulfonamide 3w.**<sup>7</sup> Yellow solid, mp 135-136 °C.  $^1\text{H}$  NMR (400 MHz, DMSO):  $\delta$  10.60 (s, 1H), 8.38 (d,  $J = 8.4$  Hz, 2H), 8.02 (d,  $J = 8.4$  Hz, 2H), 7.27 (t,  $J = 7.4$  Hz, 2H), 7.13 (d,  $J = 7.6$  Hz, 2H), 7.09 (t,  $J = 7.2$  Hz, 1H);  $^{13}\text{C}$  NMR (100 MHz, DMSO):  $\delta$  150.3, 145.4, 137.4, 129.8, 128.7, 125.2, 125.1, 121.2.

**4-Nitro-*N*-(*p*-tolyl)benzenesulfonamide 3x.**<sup>7</sup> Yellow solid, mp 179-180 °C.  $^1\text{H}$  NMR (400 MHz, DMSO):  $\delta$  10.42 (br, 1H), 8.36 (d,  $J = 8.8$  Hz, 2H), 7.97 (d,  $J = 8.8$  Hz, 2H), 7.05 (d,  $J = 8.4$  Hz, 2H), 6.99 (d,  $J = 8.4$  Hz, 2H), 2.18 (s, 3H);  $^{13}\text{C}$  NMR (100 MHz, DMSO):  $\delta$  150.2, 145.5, 134.7, 134.6, 130.2, 128.7, 125.0, 121.8, 20.8.

***N*-(4-Methoxyphenyl)-4-nitrobenzenesulfonamide 3y.**<sup>7</sup> Yellow solid, mp 182-183 °C.  $^1\text{H}$  NMR (400 MHz, DMSO):  $\delta$  10.23 (s, 1H), 8.37 (d,  $J = 8.4$  Hz, 2H), 7.93 (d,  $J = 8.4$  Hz, 2H), 7.00 (d,  $J = 8.4$  Hz, 2H), 6.83 (d,  $J = 8.0$  Hz, 2H), 3.68 (s, 3H);  $^{13}\text{C}$  NMR (100 MHz, DMSO):  $\delta$  157.5, 150.2, 145.4, 129.7, 128.8, 125.0, 124.6, 114.9, 55.7.

***N*-(4-Chlorophenyl)-4-nitrobenzenesulfonamide 3z.**<sup>7</sup> Yellow solid, mp 189-190 °C.

<sup>1</sup>H NMR (400 MHz, DMSO): δ 10.74 (br, 1H), 8.39 (d, *J* = 6.8 Hz, 2H), 8.00 (d, *J* = 6.8 Hz, 2H), 7.33 (d, *J* = 6.8 Hz, 2H), 7.13 (d, *J* = 6.8 Hz, 2H); <sup>13</sup>C NMR (100 MHz, DMSO): δ 150.4, 145.0, 136.4, 129.8, 129.5, 128.7, 125.2, 122.8.

***N*-Phenylnaphthalene-2-sulfonamide 3a'**. White solid, mp 133-134 °C. <sup>1</sup>H NMR (400 MHz, CDCl<sub>3</sub>): δ 8.41 (s, 1H), 7.87-7.79 (m, 4H), 7.62-7.52 (m, 2H), 7.50 (s, 1H), 7.21-7.12 (m, 4H), 7.05 (t, *J* = 7.2 Hz, 1H); <sup>13</sup>C NMR (100 MHz, CDCl<sub>3</sub>): δ 136.4, 135.9, 134.9, 132.0, 129.5, 129.4, 129.3, 129.0, 127.9, 127.6, 125.4, 122.3, 121.6. Anal. Calcd. for C<sub>16</sub>H<sub>13</sub>NO<sub>2</sub>S: C, 67.82; H, 4.62; N, 4.94; S, 11.32. Found: C, 67.58; H, 4.35; N, 4.67; S, 11.14.

***N*-(4-Methoxyphenyl)naphthalene-2-sulfonamide 3b'**. Yellow liquid. <sup>1</sup>H NMR (400 MHz, CDCl<sub>3</sub>): δ 8.29 (s, 1H), 7.89-7.85 (m, 3H), 7.72 (dd, *J* = 8.6, 1.8 Hz, 1H), 7.64-7.54 (m, 2H), 7.00 (d, *J* = 8.8 Hz, 2H), 6.86 (s, 1H), 6.72 (d, *J* = 8.8 Hz, 2H), 3.72 (s, 3H); <sup>13</sup>C NMR (100 MHz, CDCl<sub>3</sub>): δ 158.1, 136.0, 134.9, 132.1, 129.3, 129.2, 128.9, 128.7, 127.9, 127.5, 125.7, 122.5, 114.5, 55.4. Anal. Calcd. for C<sub>17</sub>H<sub>15</sub>NO<sub>3</sub>S: C, 65.16; H, 4.82; N, 4.47; S, 10.23. Found: C, 65.28; H, 4.57; N, 4.25; S, 10.06.

***N*-(4-Fluorophenyl)naphthalene-2-sulfonamide 3c'**. White solid, mp 106-108 °C. <sup>1</sup>H NMR (400 MHz, CDCl<sub>3</sub>): δ 8.34 (s, 1H), 7.90-7.85 (m, 3H), 7.77 (dd, *J* = 8.8, 1.6 Hz, 1H), 7.65-7.55 (m, 2H), 7.43 (s, 1H), 7.11-7.07 (m, 2H), 6.88 (t, *J* = 8.6 Hz, 2H); <sup>13</sup>C NMR (100 MHz, CDCl<sub>3</sub>): δ 160.8 (d, *J*<sub>C-F</sub> = 250.1 Hz), 135.7, 135.5, 135.0, 132.1 (d, *J*<sub>C-F</sub> = 19.6 Hz), 129.5, 129.3, 129.1, 129.0, 127.9, 127.7, 124.7 (d, *J*<sub>C-F</sub> = 8.5 Hz), 122.2, 116.2 (d, *J*<sub>C-F</sub> = 22.5 Hz). Anal. Calcd. for C<sub>16</sub>H<sub>12</sub>FNO<sub>2</sub>S: C, 63.77; H, 4.01; N, 4.65; S, 10.64. Found: C, 63.53; H, 3.88; N, 4.41; S, 10.37.

**4-Chloro-*N*-phenylbenzenesulfonamide 3d'**.<sup>3</sup> White solid, mp 104-105 °C. <sup>1</sup>H NMR (400 MHz, CDCl<sub>3</sub>): δ 7.72 (d, *J* = 8.4 Hz, 2H), 7.39 (d, *J* = 8.4 Hz, 2H); 7.27-7.22 (m, 3H), 7.15-7.08 (m, 3H); <sup>13</sup>C NMR (100 MHz, CDCl<sub>3</sub>): δ 139.7, 137.4, 136.1, 129.5, 129.4, 128.7, 125.8, 121.9.

**4-Chloro-*N*-(4-chlorophenyl)benzenesulfonamide 3e'**. White solid, mp 146-147 °C. <sup>1</sup>H NMR (400 MHz, CDCl<sub>3</sub>): δ 7.71 (d, *J* = 8.8 Hz, 2H), 7.42 (d, *J* = 8.8 Hz, 2H), 7.28 (s, 1H), 7.22 (d, *J* = 8.8 Hz, 2H), 7.03 (d, *J* = 8.8 Hz, 2H); <sup>13</sup>C NMR (100 MHz, CDCl<sub>3</sub>): δ 140.0, 137.0, 134.6, 131.5, 129.6, 129.5, 128.7, 123.3. Anal. Calcd. for C<sub>12</sub>H<sub>9</sub>Cl<sub>2</sub>NO<sub>2</sub>S: C, 47.70; H, 3.00; N, 4.64; S, 10.61. Found: C, 47.43; H, 3.11; N, 4.39; S, 10.43.

**4-Chloro-*N*-(4-methoxyphenyl)benzenesulfonamide 3f'**. White solid, mp 141-142 °C. <sup>1</sup>H NMR (400 MHz, CDCl<sub>3</sub>): δ 7.64 (d, *J* = 8.4 Hz, 2H), 7.39 (d, *J* = 8.4 Hz, 2H), 6.99 (d, *J* = 8.8 Hz, 2H), 6.93 (s, 1H), 6.77 (d, *J* = 8.8 Hz, 2H), 3.76 (s, 3H); <sup>13</sup>C NMR (100 MHz, CDCl<sub>3</sub>): δ 158.2, 139.4, 137.4, 129.3, 128.8, 128.4, 125.7, 114.6, 55.5. Anal. Calcd. for C<sub>13</sub>H<sub>12</sub>ClNO<sub>3</sub>S: C, 52.44; H, 4.06; N, 4.70; S, 10.77. Found: C, 52.23; H, 3.79; N, 4.56; S, 10.58.

**2-Methyl-6*H*-dibenzo[*c,e*][1,2]thiazine 5,5-dioxide 4a.**<sup>3</sup> White solid, mp 162-164 °C. <sup>1</sup>H NMR (400 MHz, CDCl<sub>3</sub>): δ 7.99 (d, *J* = 8.0 Hz, 1H), 7.89 (d, *J* = 8.0 Hz, 1H), 7.78 (s, 1H), 7.42-7.36 (m, 2H), 7.32-7.28 (m, 1H), 7.23 (br, 1H), 7.12 (d, *J* = 8.0 Hz, 1H), 2.52 (s, 3H); <sup>13</sup>C NMR (100 MHz, CDCl<sub>3</sub>): δ 143.1, 135.6, 132.4, 132.3, 130.2, 129.1, 125.8, 125.3, 125.0, 123.0, 122.1, 120.6, 22.0.



## References

- 1 W. Zhang, J. Xie, B. Rao and M. Luo, *J. Org. Chem.*, 2015, **80**, 3504-3511.
- 2 Y.-C. Teo and F.-F. Yong, *Synlett*, 2011, 837-843.
- 3 S.-Y. Moon, J. Nam, K. Rathwell and W.-S. Kim, *Org. Lett.*, 2014, **16**, 338-341.
- 4 R. Lis and A. J. Marisca, *J. Org. Chem.*, 1987, **52**, 4377-4379.
- 5 B. R. Rosen, J. C. Ruble, T. J. Beauchamp and A. Navarro, *Org. Lett.*, 2011, **13**, 2564-2567.
- 6 T. Kato, I. Okamoto, A. Tanatani, T. Hatano, M. Uchiyama, H. Kagechika, H. Masu, K. Katagiri, M. Tominaga, K. Yamaguchi and I. Azumaya, *Org. Lett.*, 2006, **8**, 5017-5020.
- 7 A. L. Pera, A. Leggio and A. Liguori, *Tetrahedron*, 2006, **62**, 6100-6106.

**$^1\text{H}$  NMR and  $^{13}\text{C}$  NMR spectra of compounds 3a-3f and 4a.**

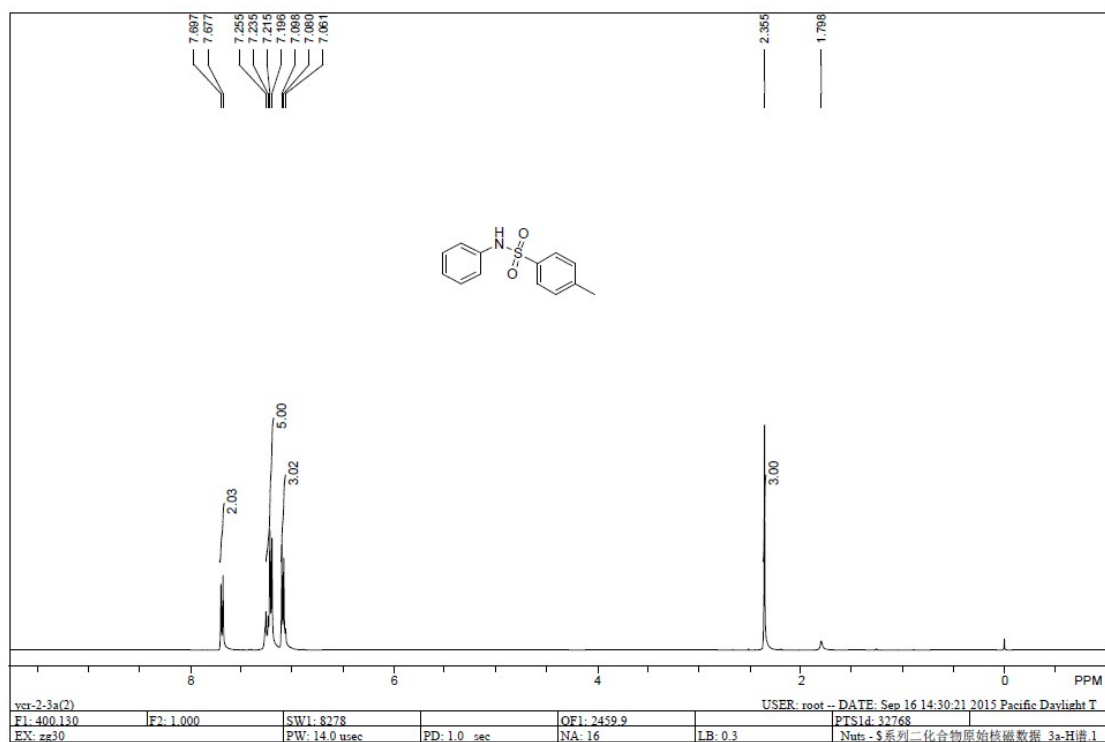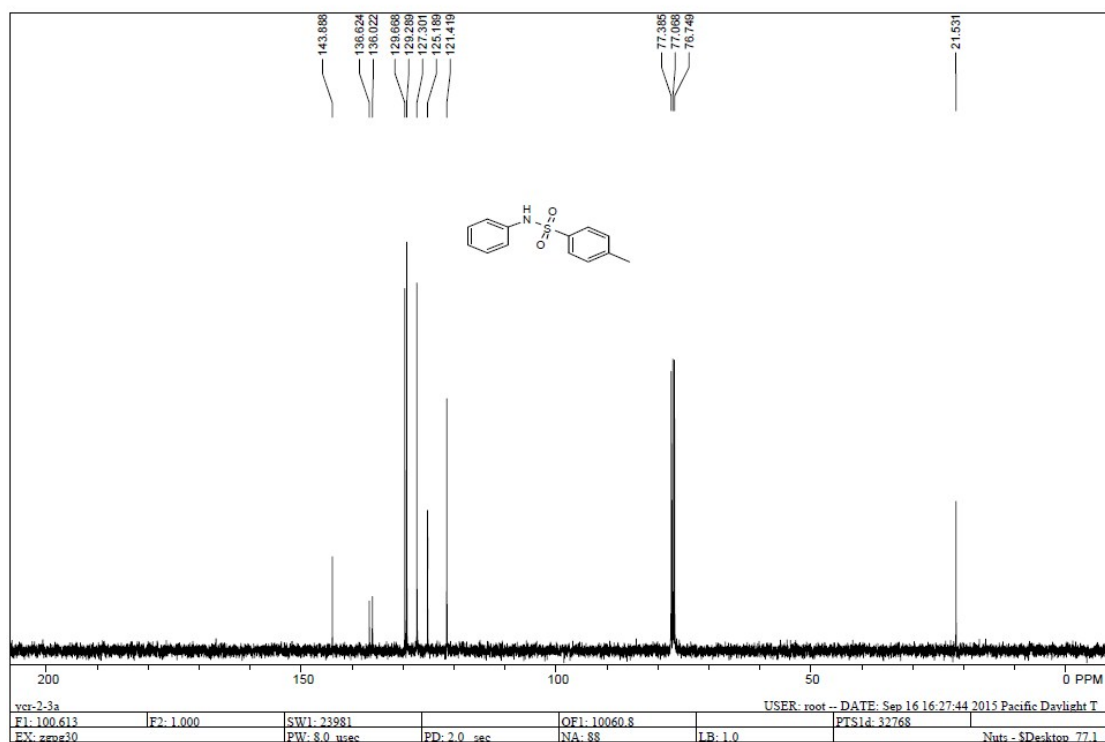

<sup>1</sup>H NMR and <sup>13</sup>C NMR spectra of compound **3a**

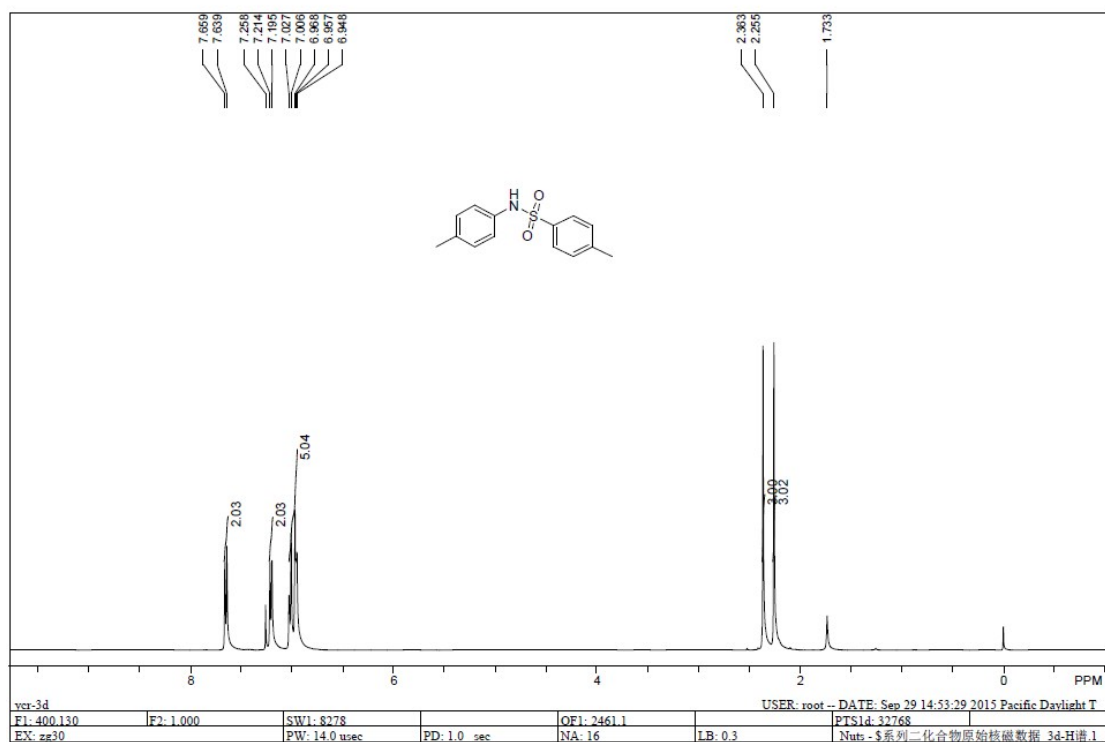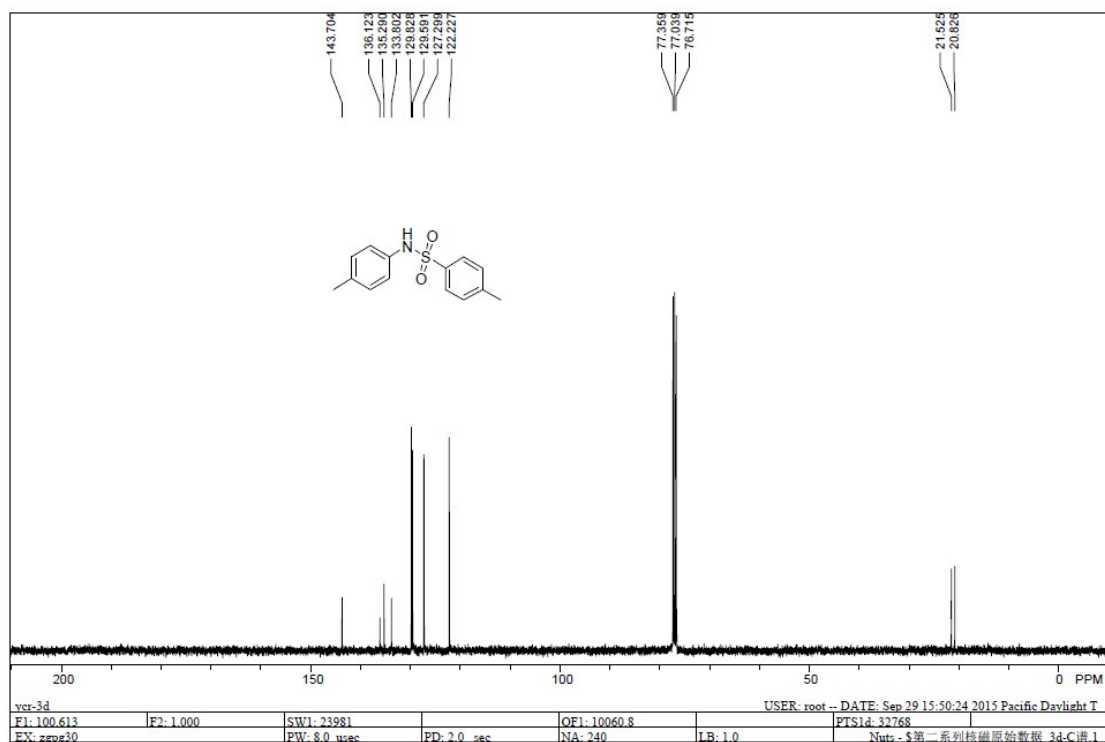

<sup>1</sup>H NMR and <sup>13</sup>C NMR spectra of compound 3b

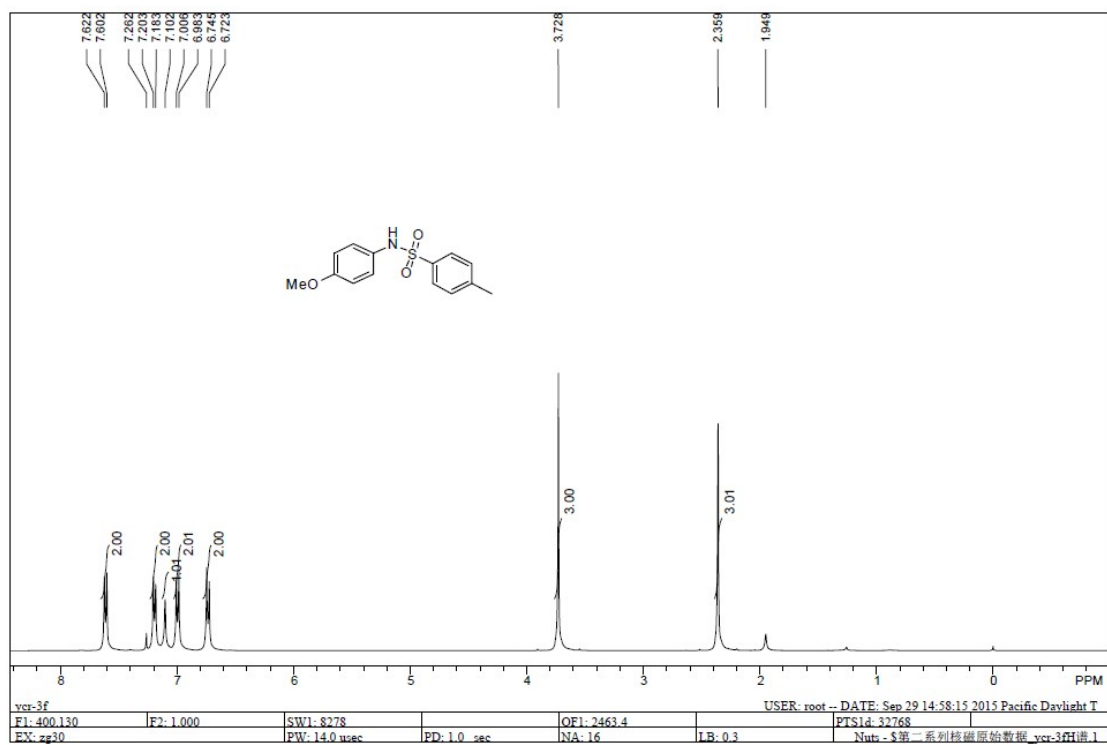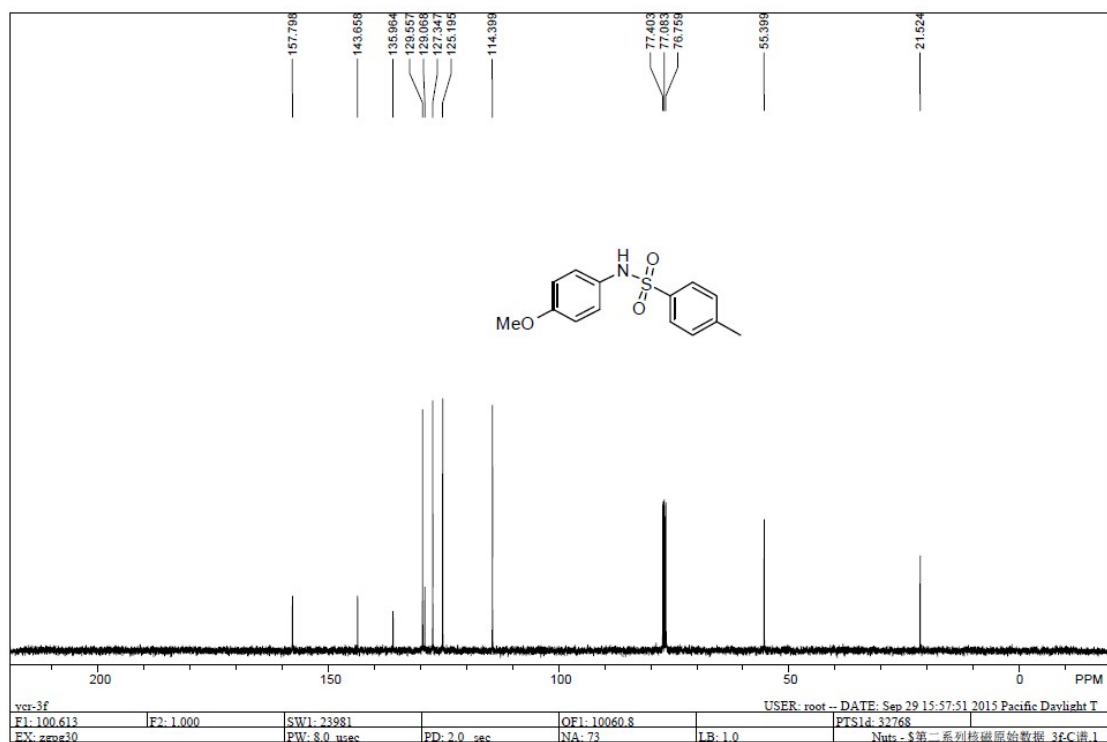

<sup>1</sup>H NMR and <sup>13</sup>C NMR spectra of compound 3c

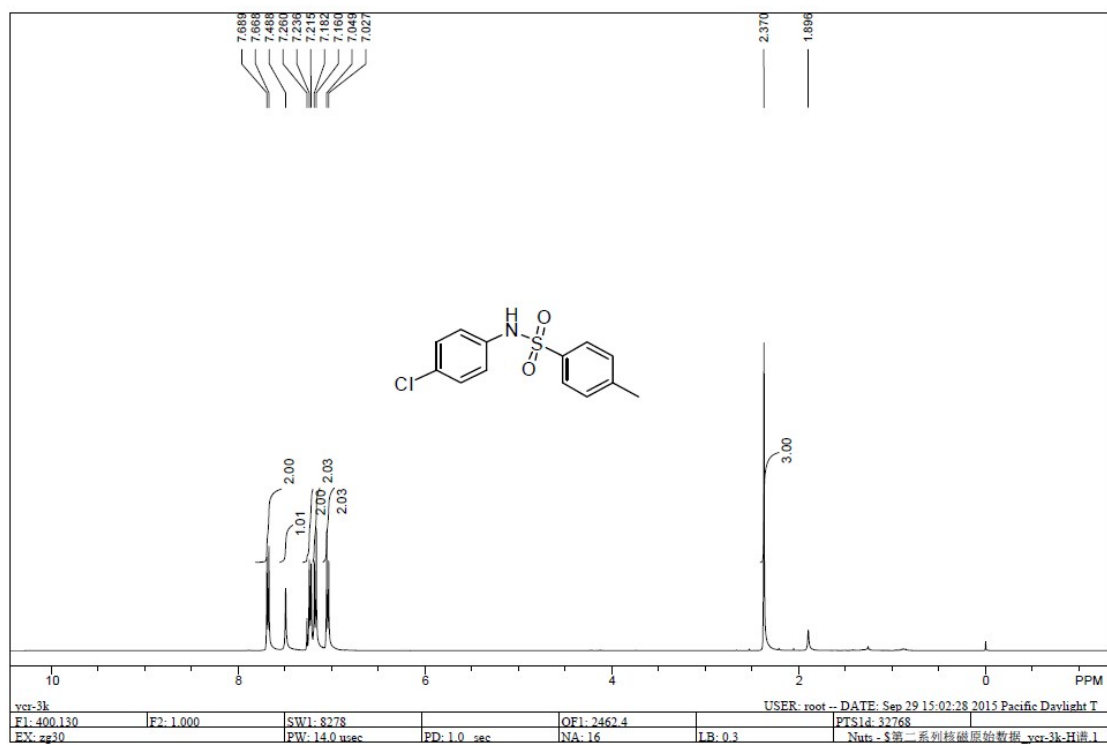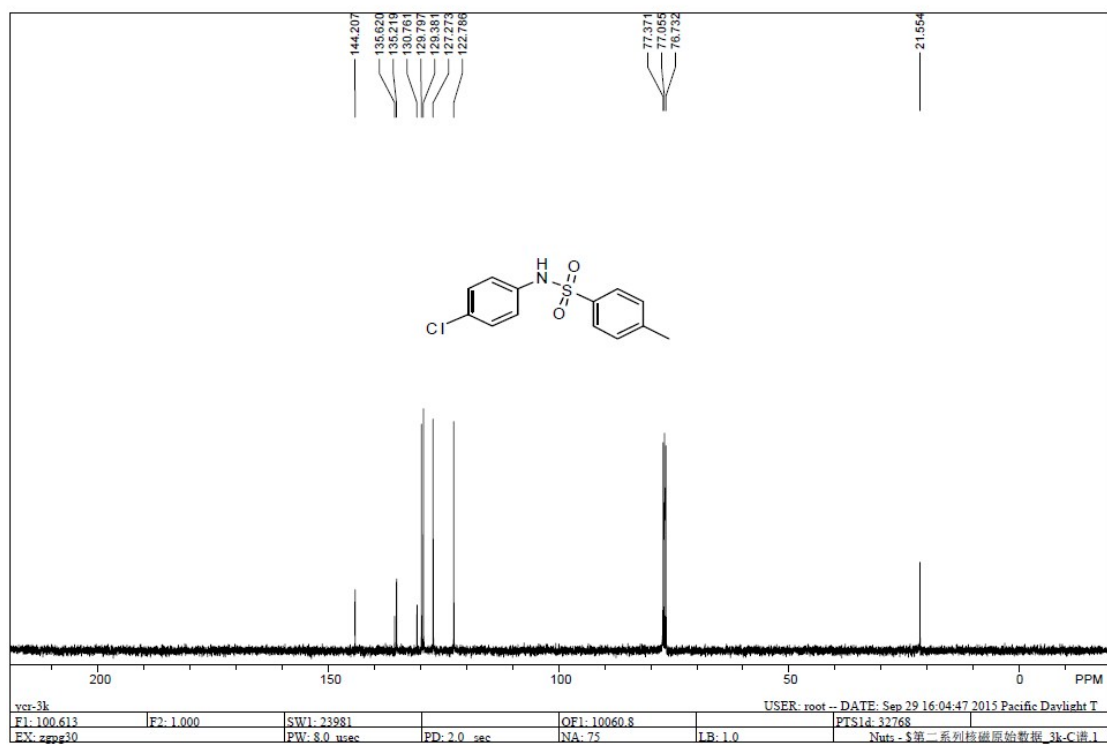

$^1\text{H}$  NMR and  $^{13}\text{C}$  NMR spectra of compound **3d**

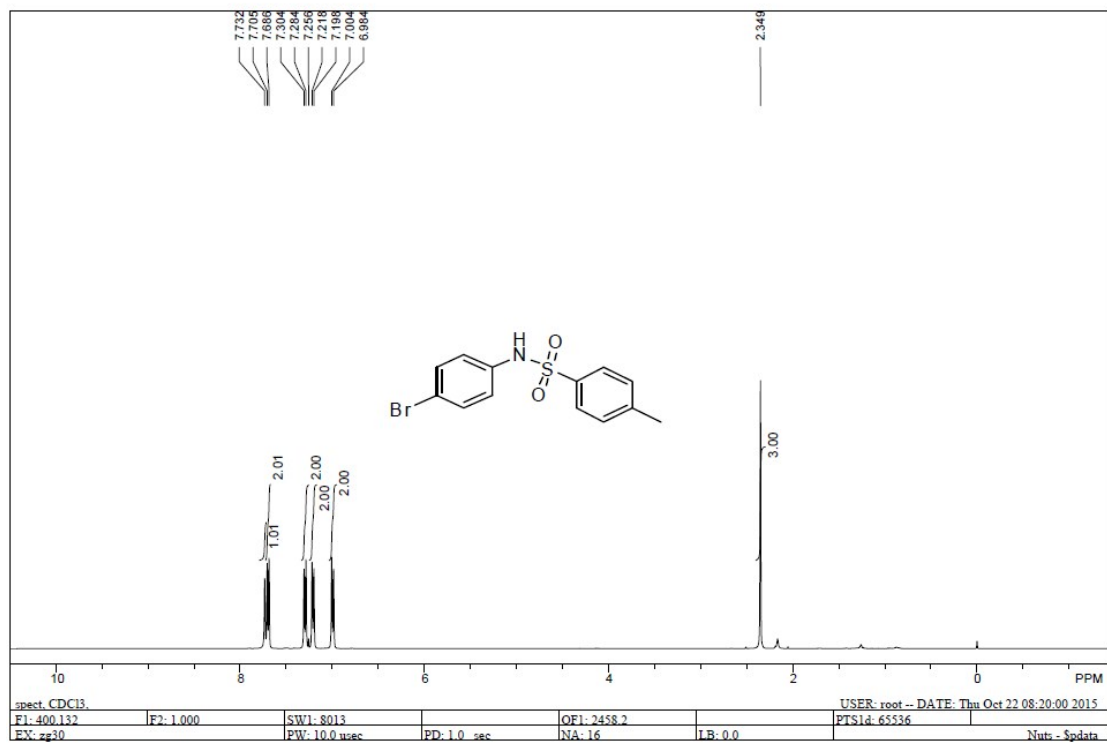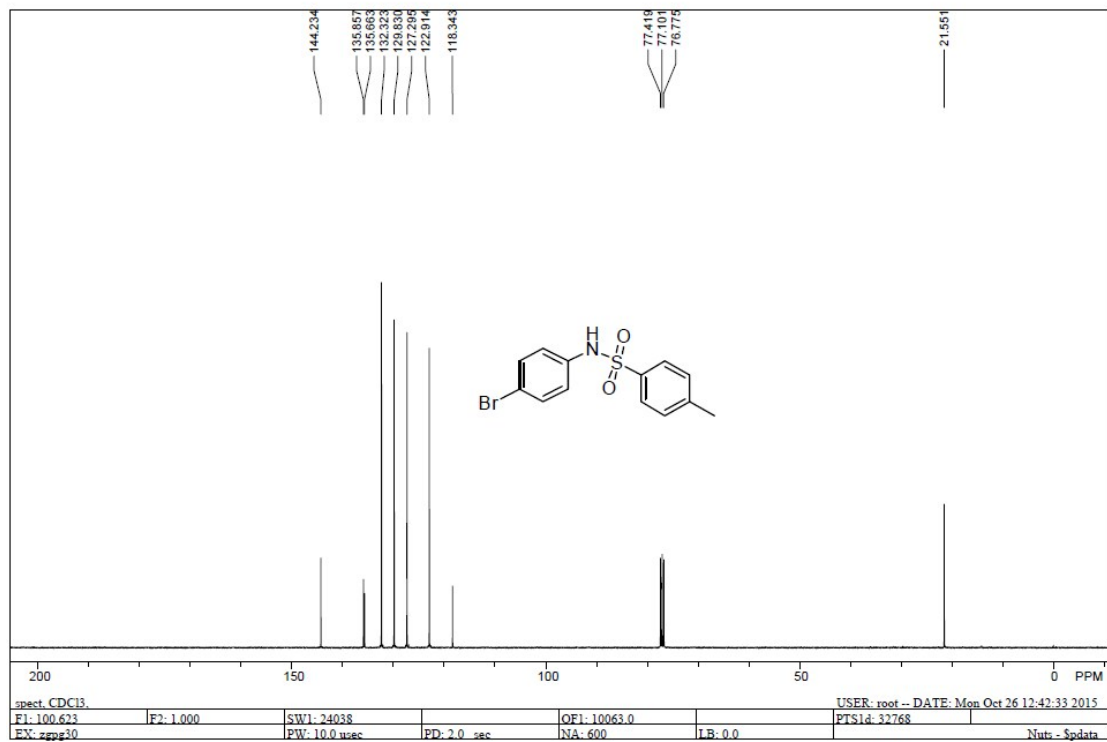

<sup>1</sup>H NMR and <sup>13</sup>C NMR spectra of compound 3e

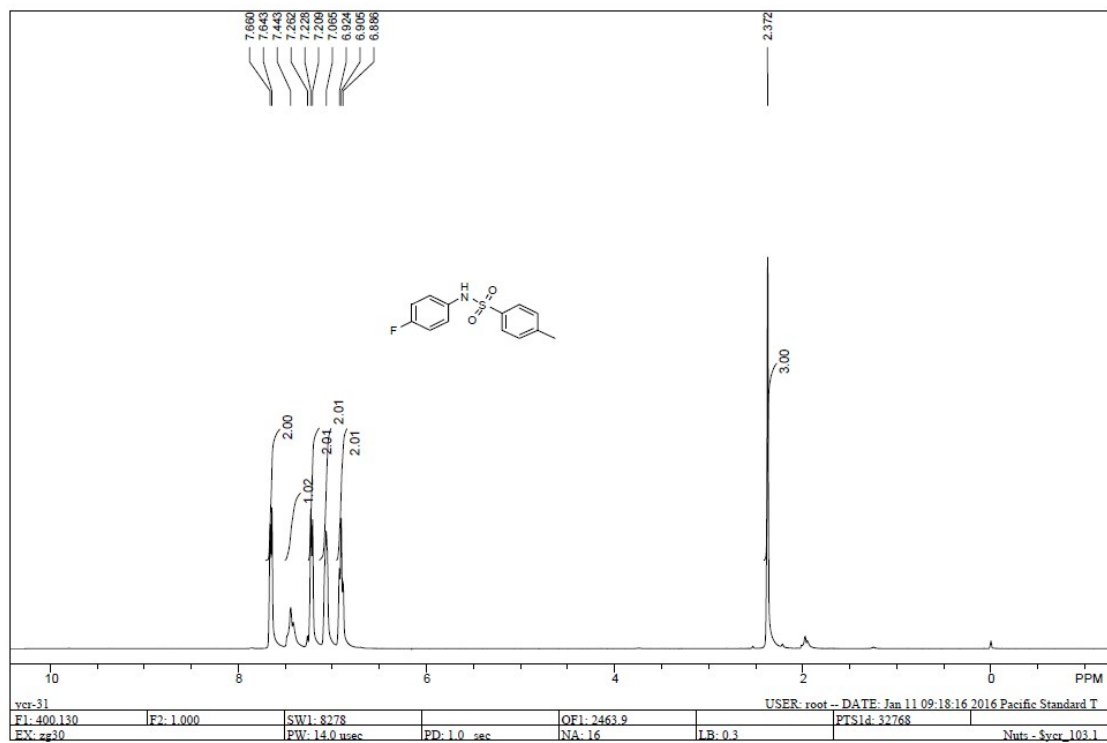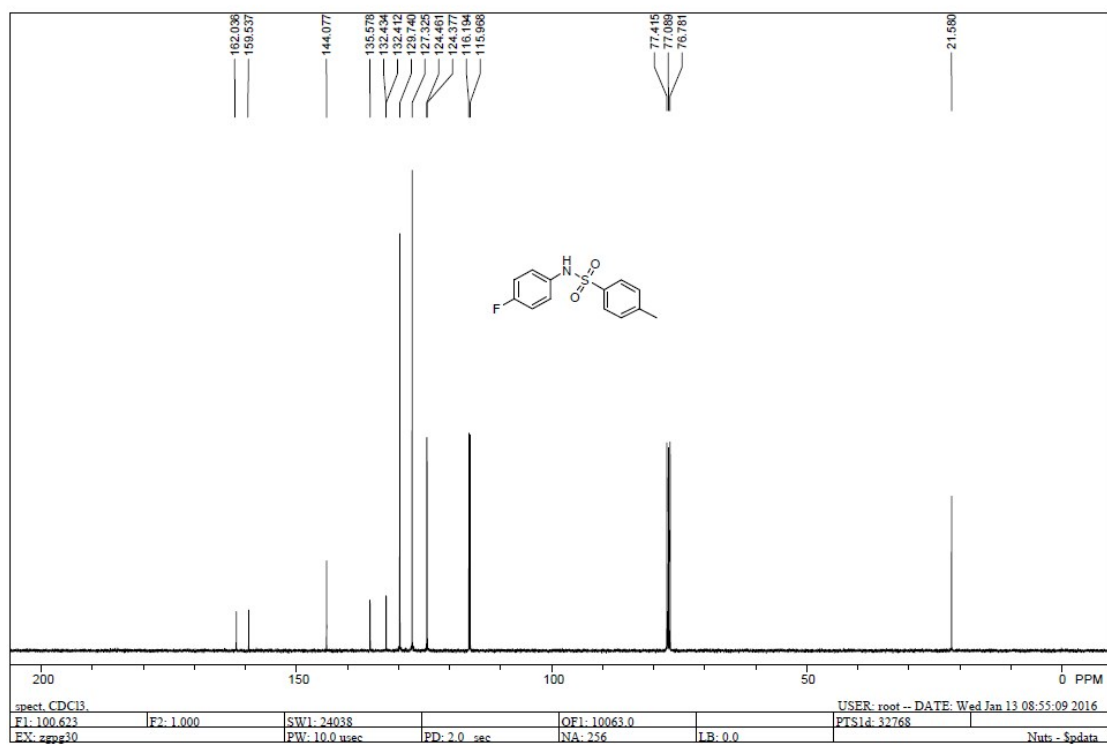

<sup>1</sup>H NMR and <sup>13</sup>C NMR spectra of compound 3f



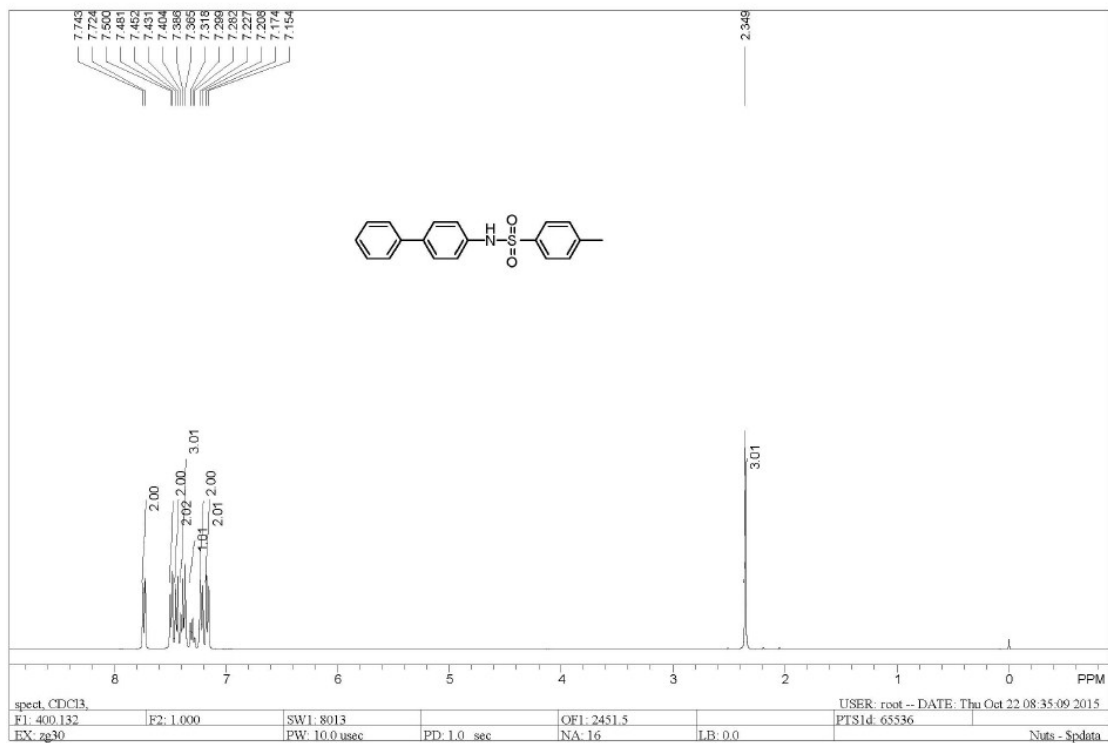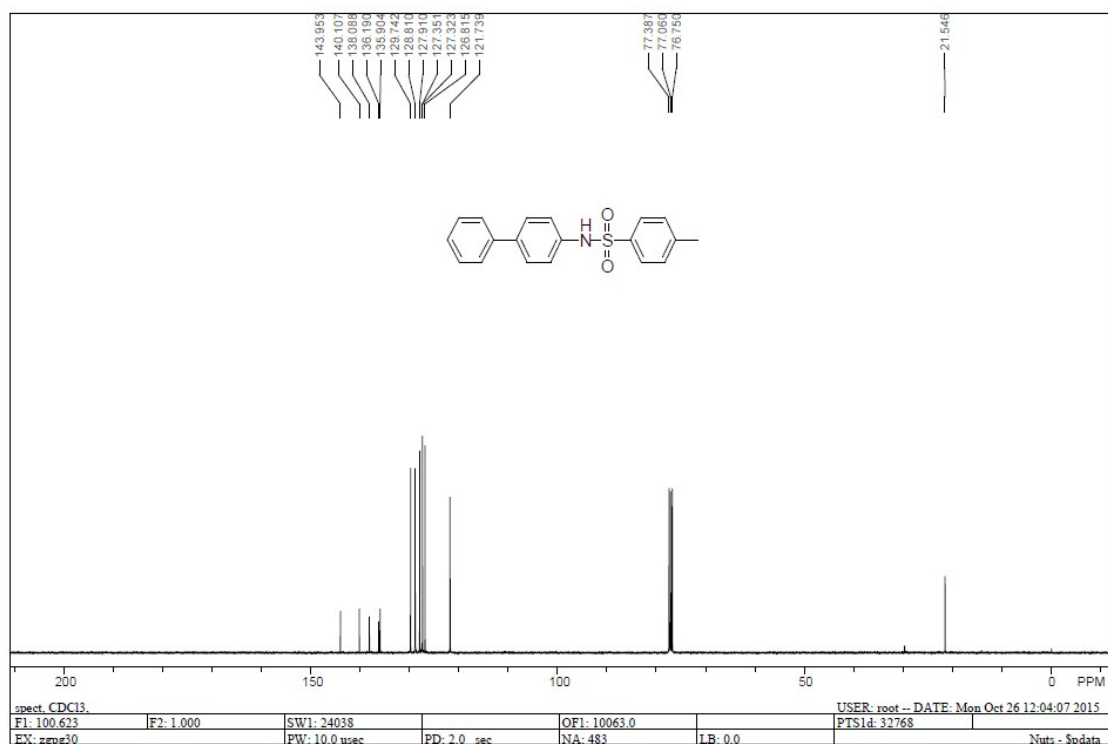

<sup>1</sup>H NMR and <sup>13</sup>C NMR spectra of compound 3g

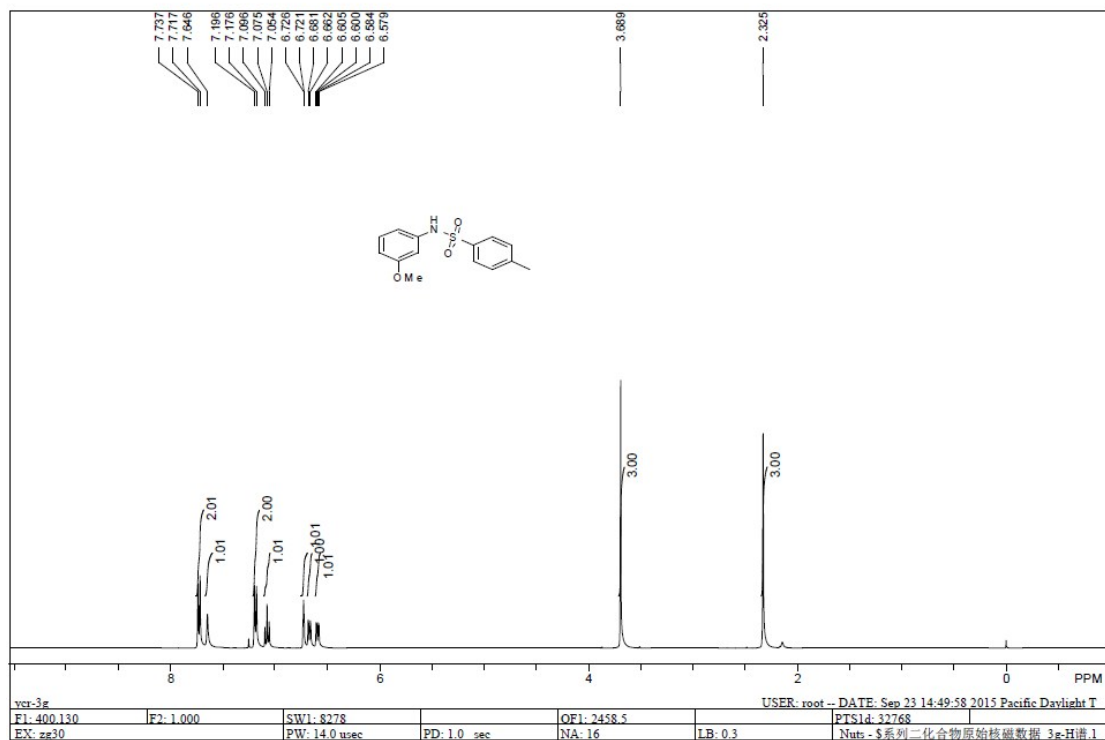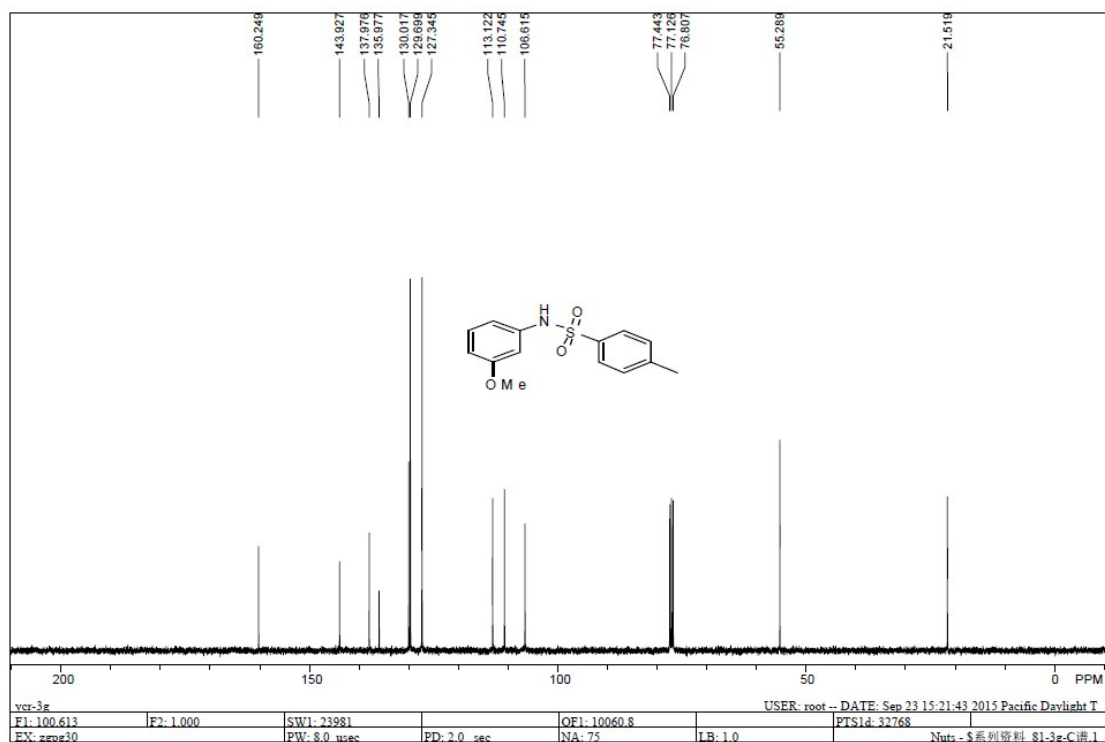

<sup>1</sup>H NMR and <sup>13</sup>C NMR spectra of compound 3h

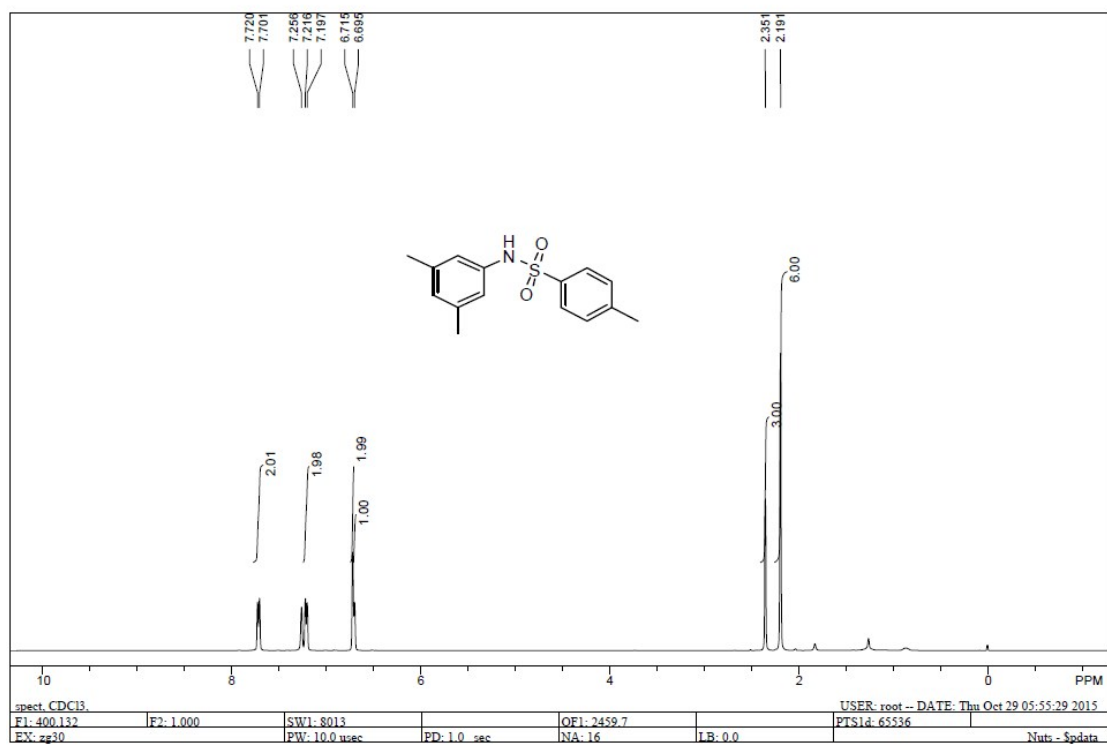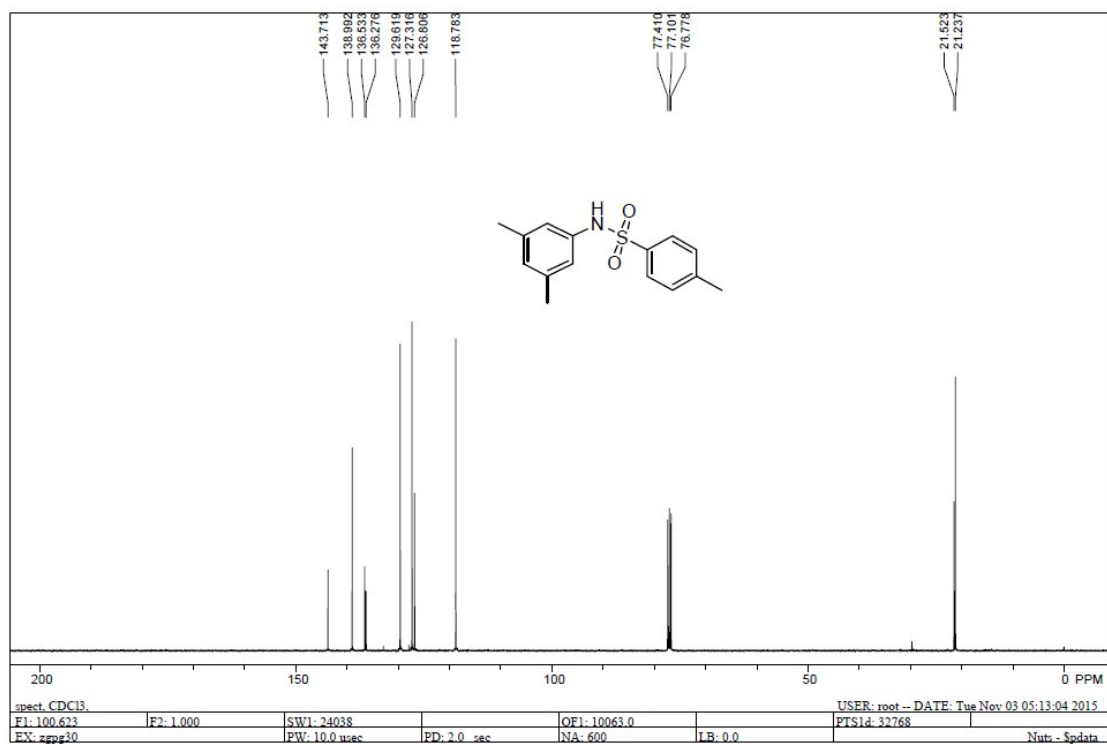

$^1\text{H}$  NMR and  $^{13}\text{C}$  NMR spectra of compound **3i**

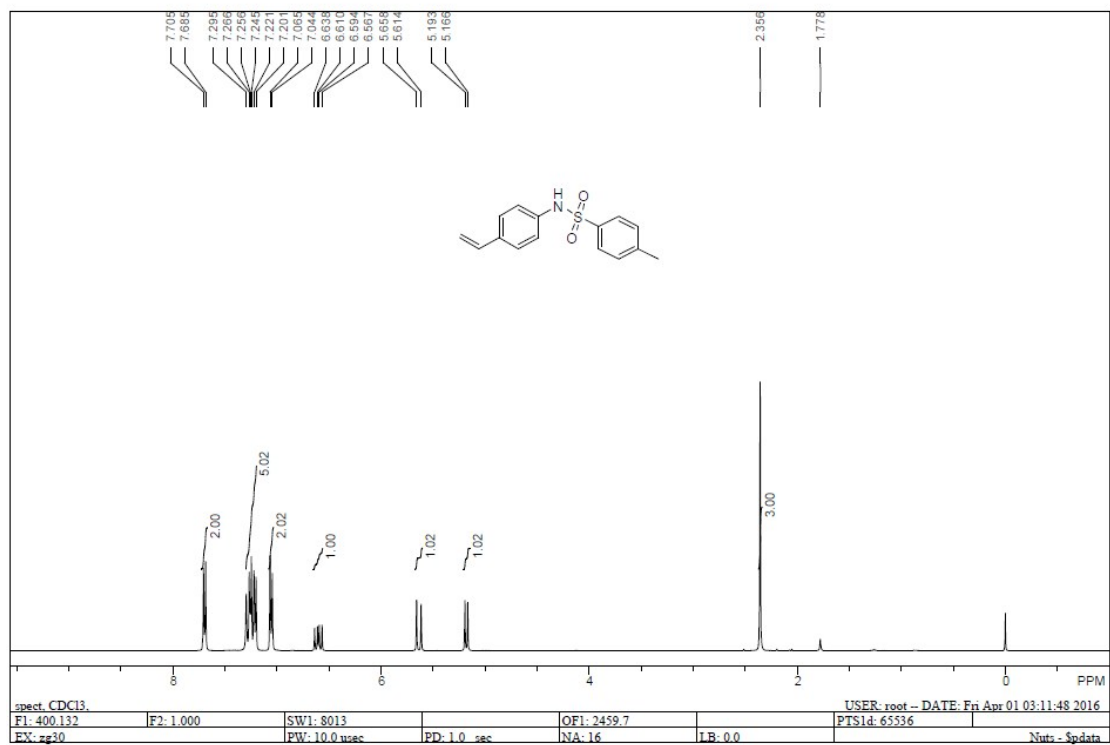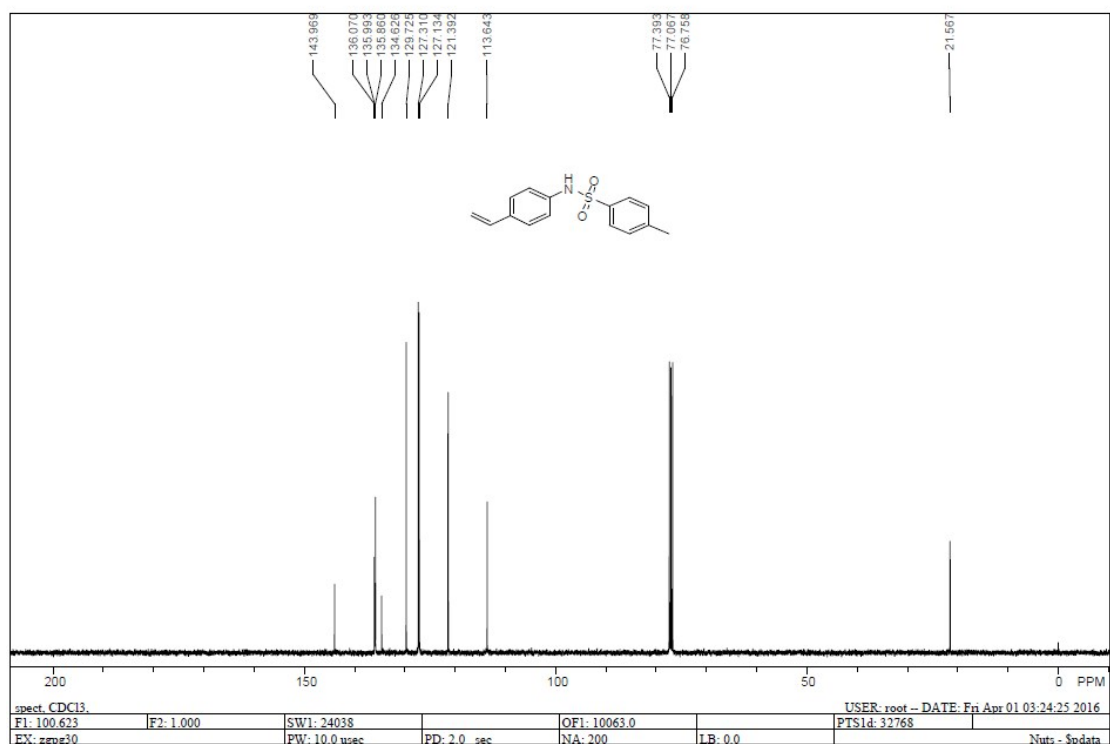

<sup>1</sup>H NMR and <sup>13</sup>C NMR spectra of compound **3j**

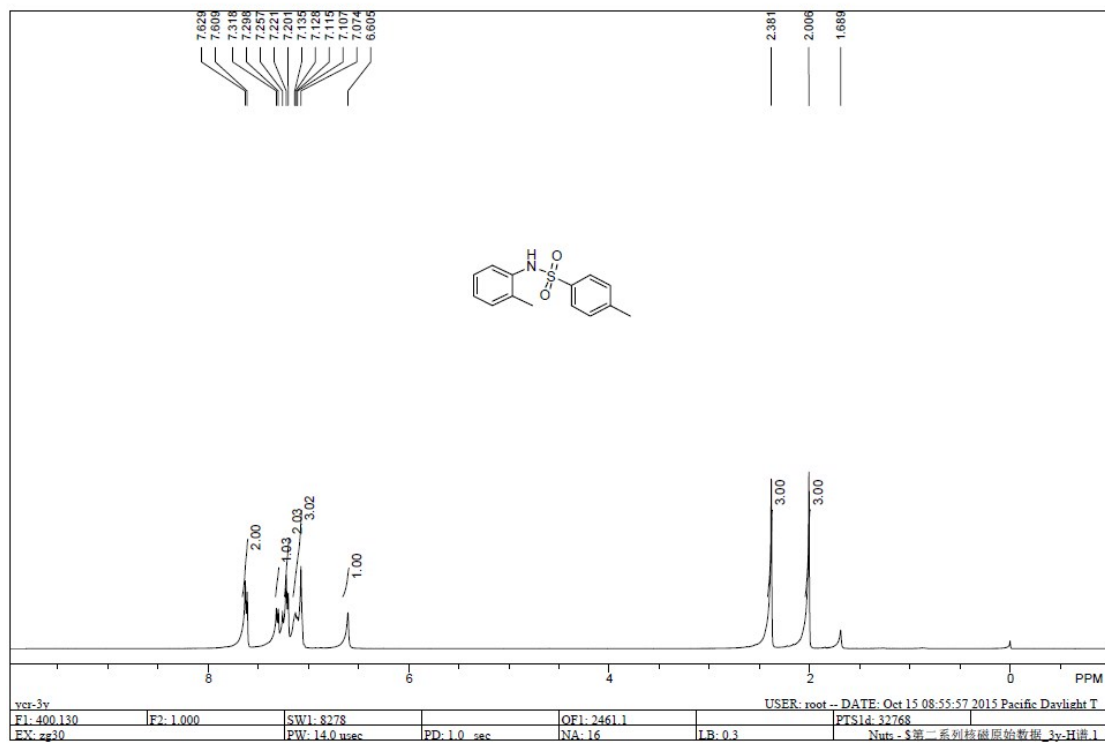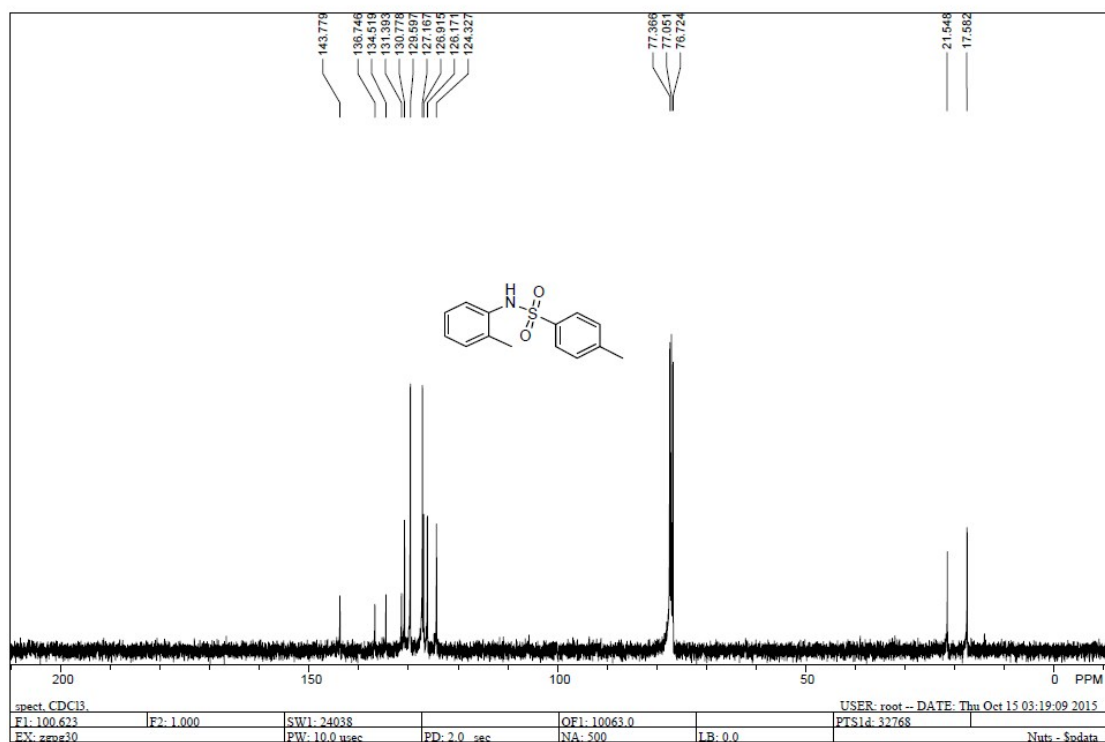

<sup>1</sup>H NMR and <sup>13</sup>C NMR spectra of compound 3k

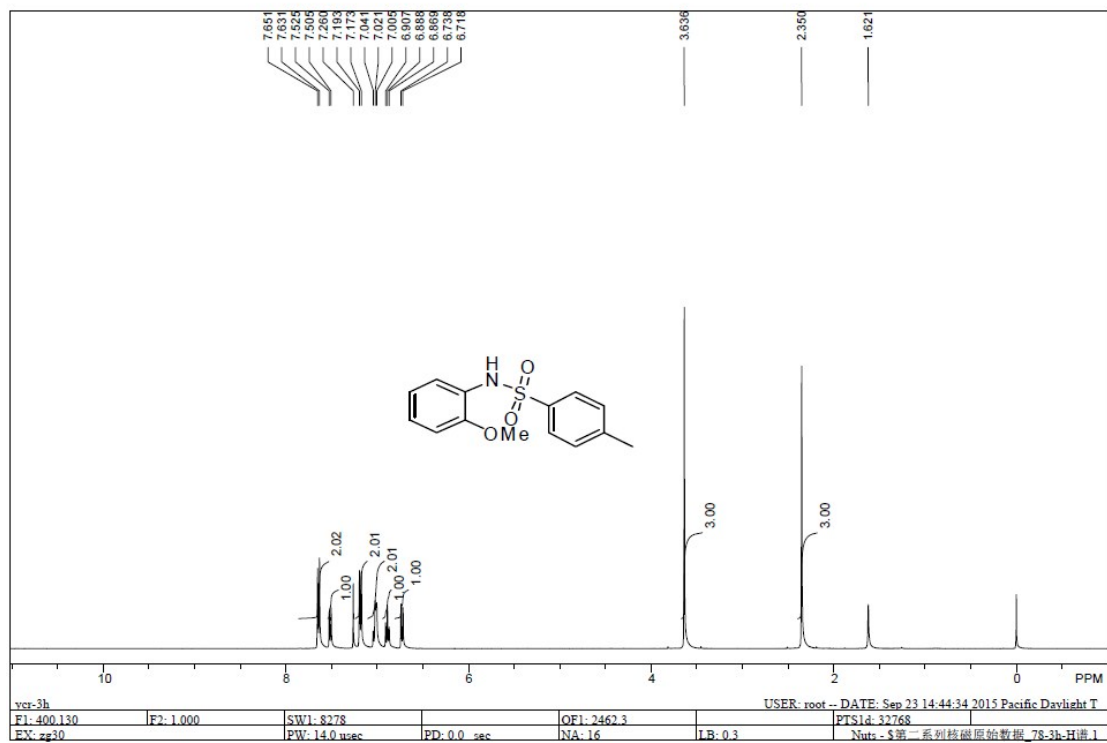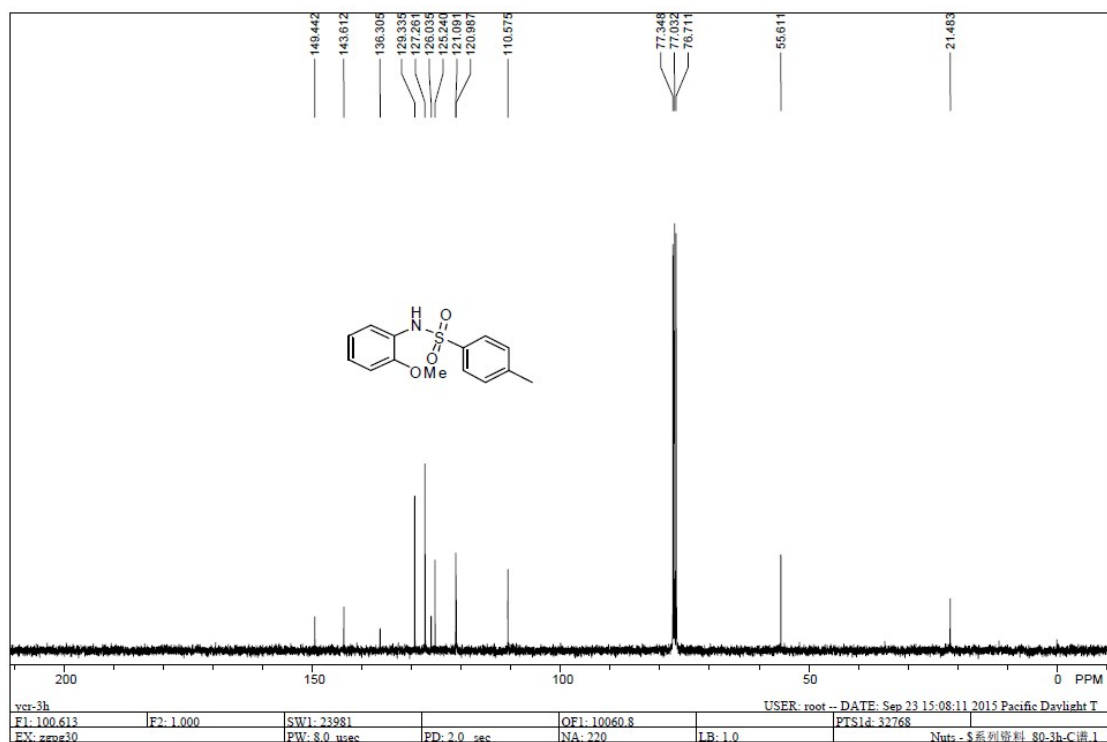

<sup>1</sup>H NMR and <sup>13</sup>C NMR spectra of compound 31

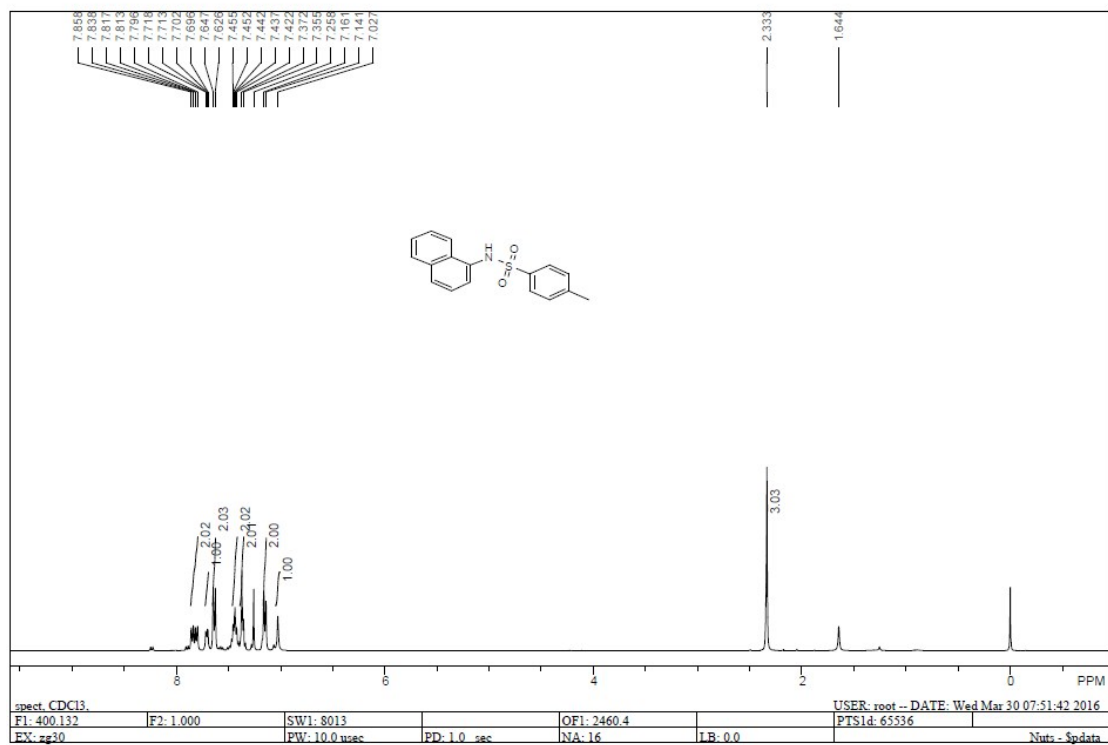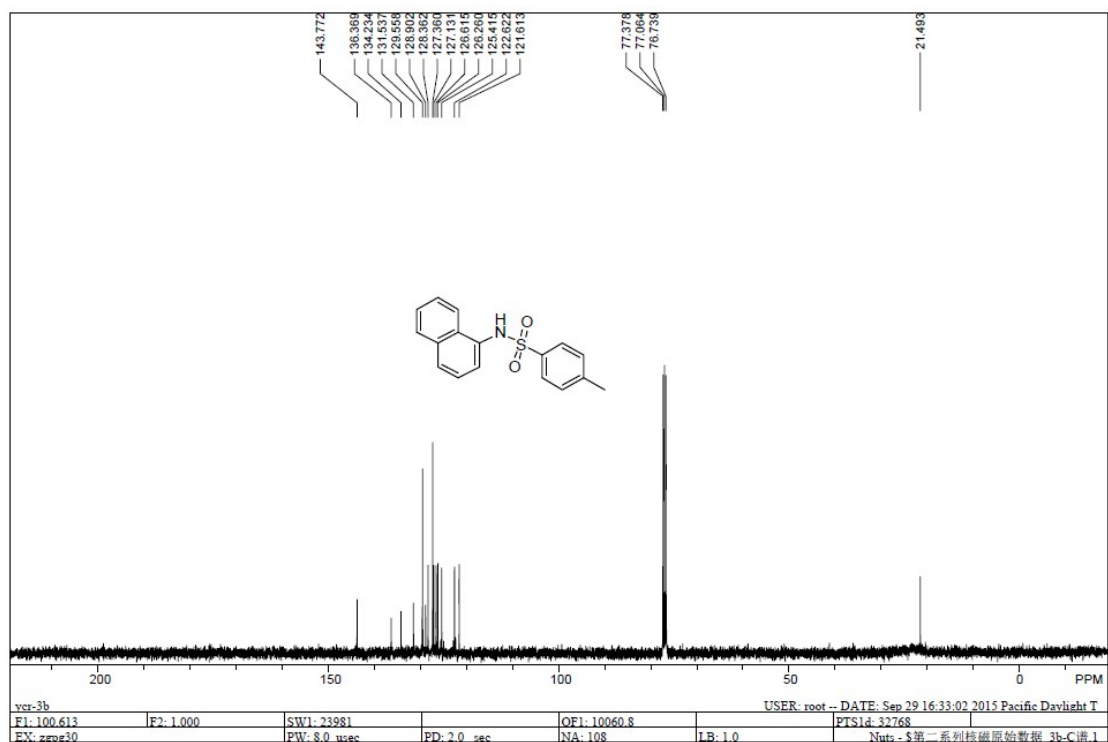

<sup>1</sup>H NMR and <sup>13</sup>C NMR spectra of compound 3m

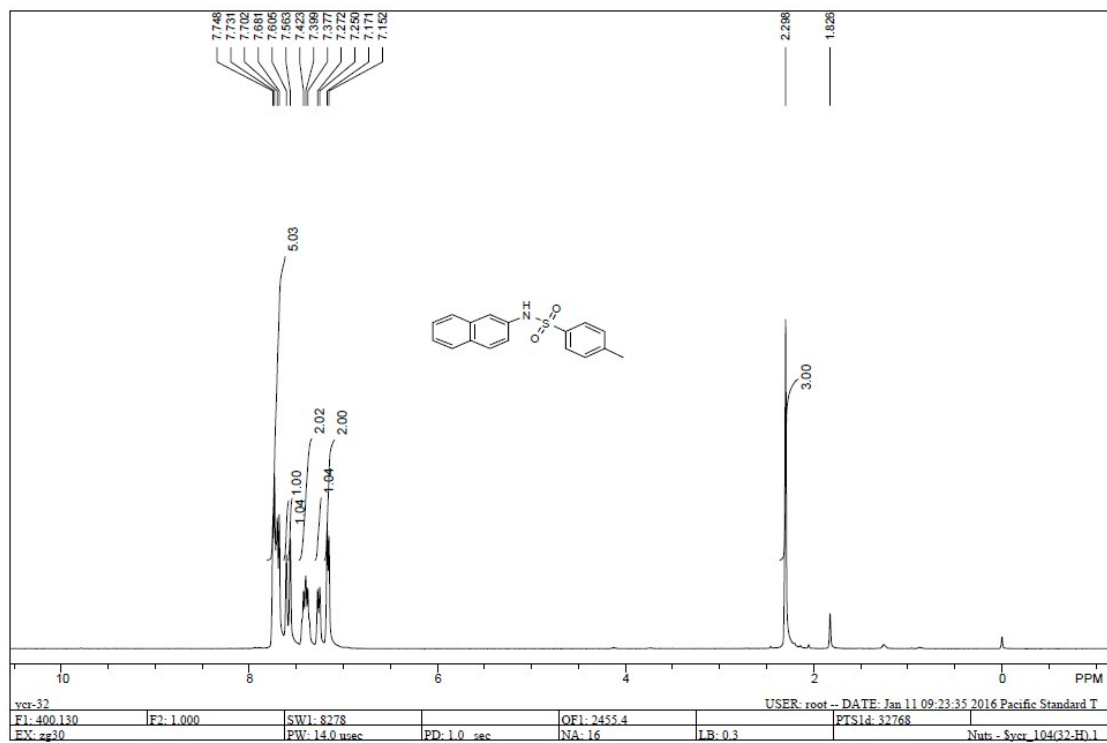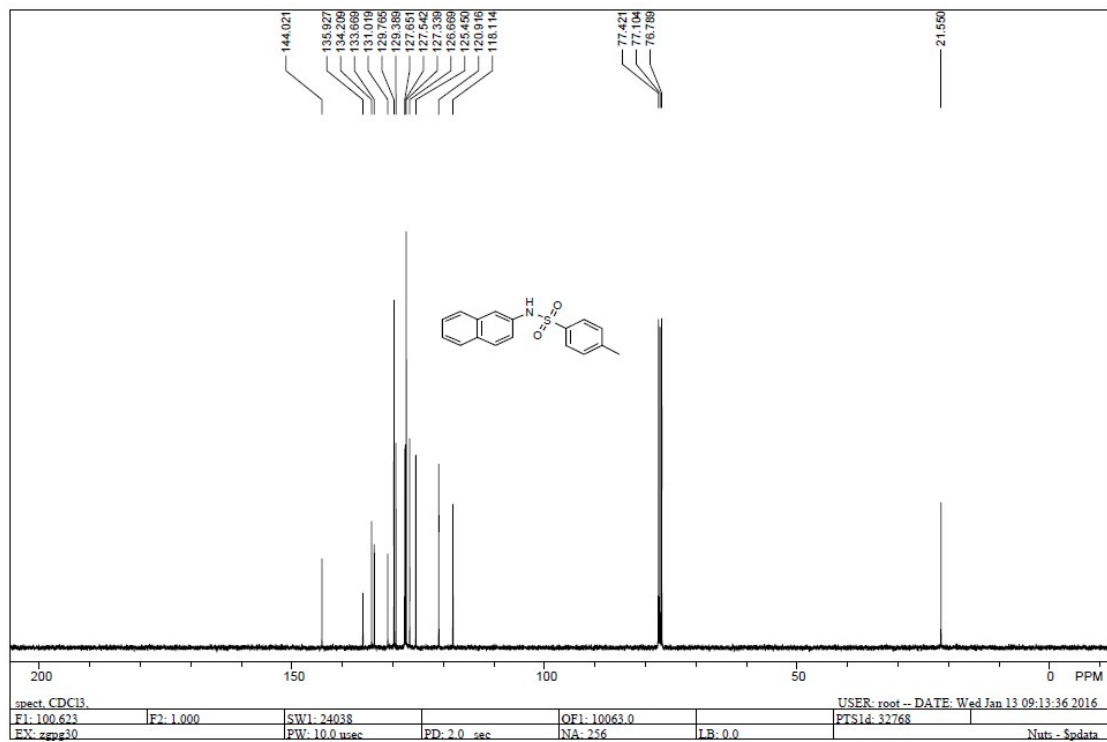

<sup>1</sup>H NMR and <sup>13</sup>C NMR spectra of compound **3n**



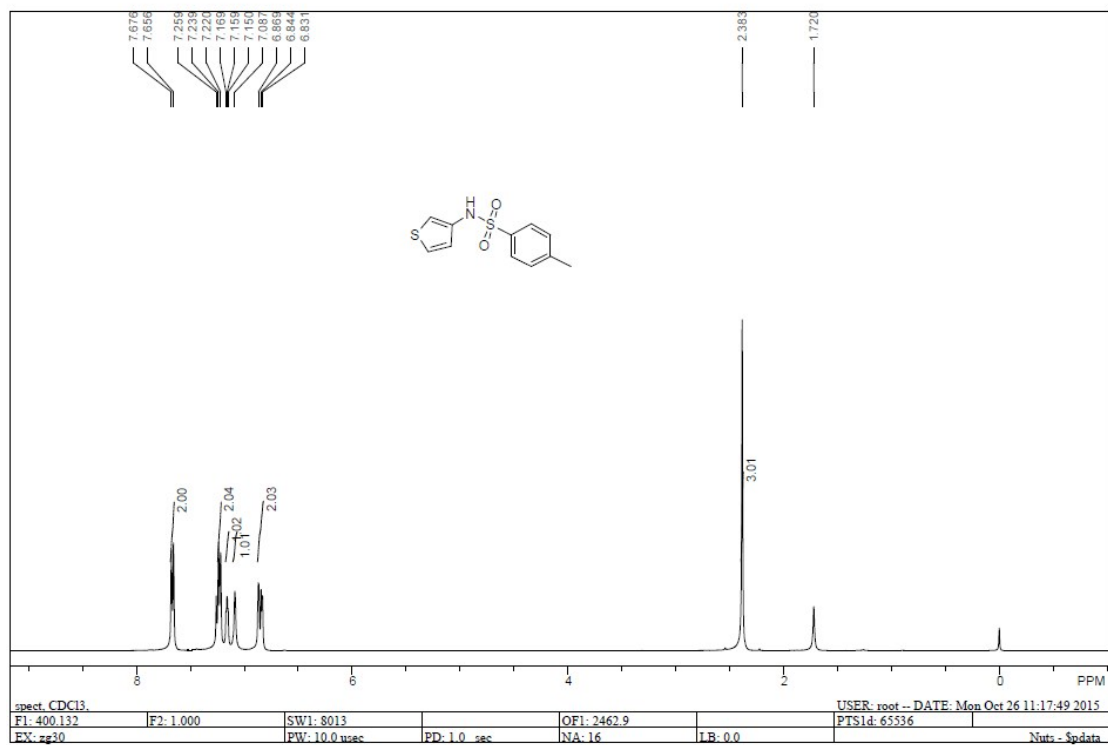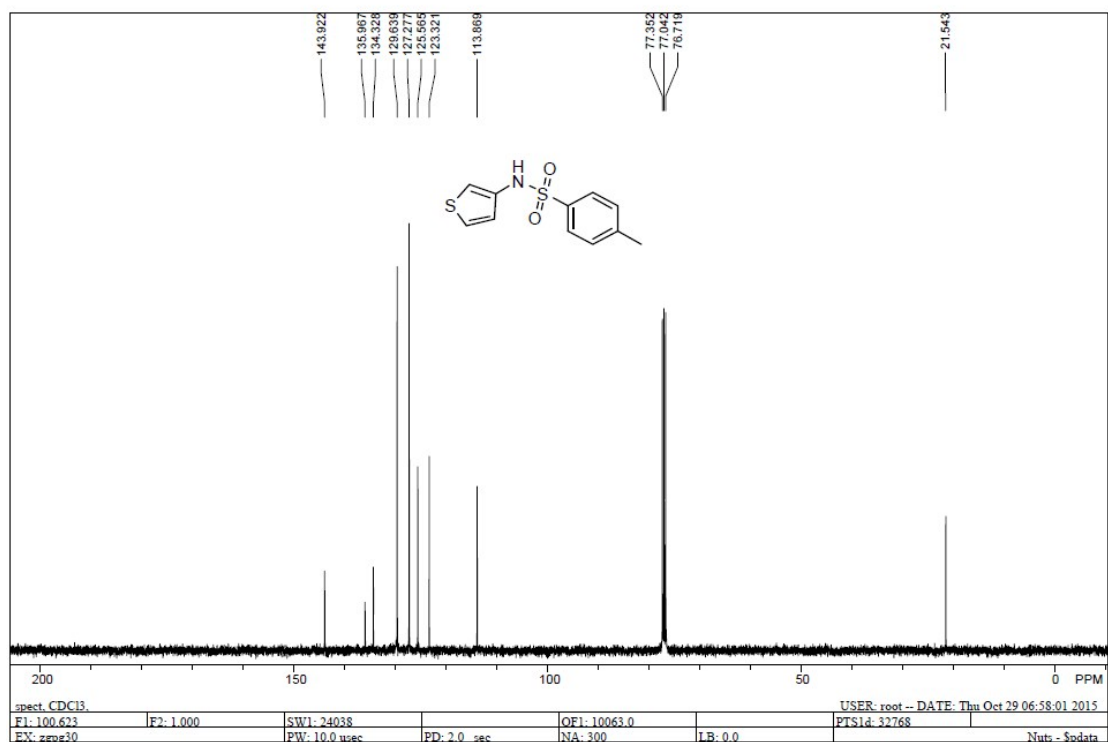

<sup>1</sup>H NMR and <sup>13</sup>C NMR spectra of compound **3o**

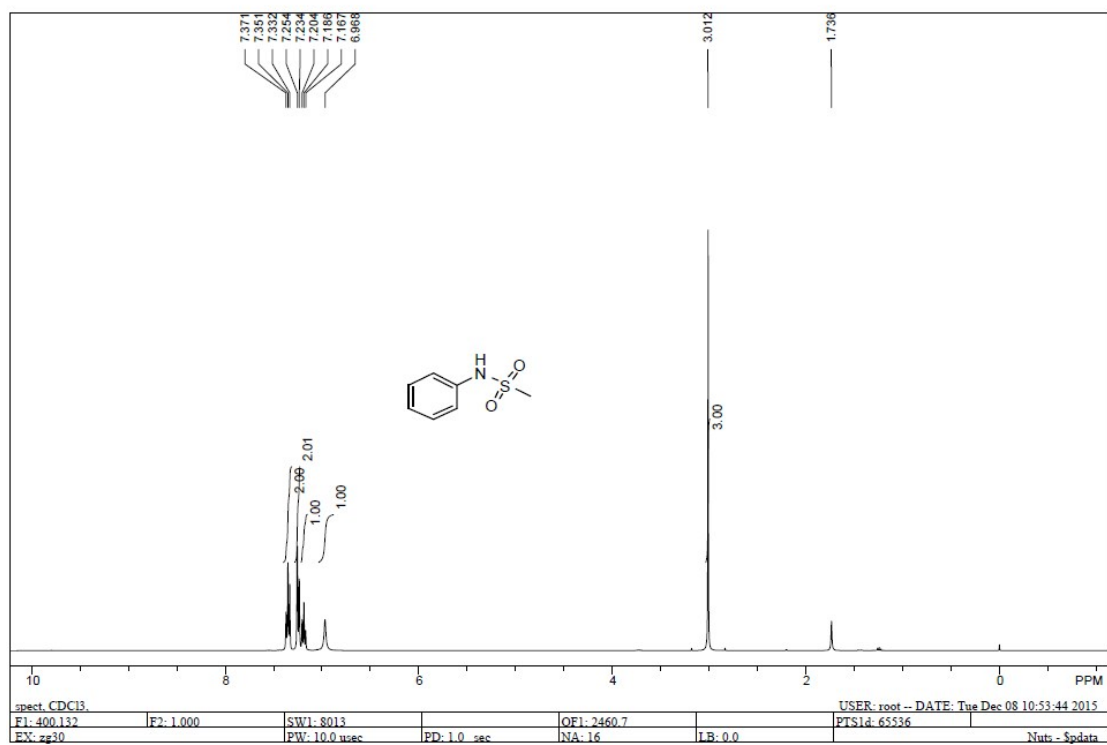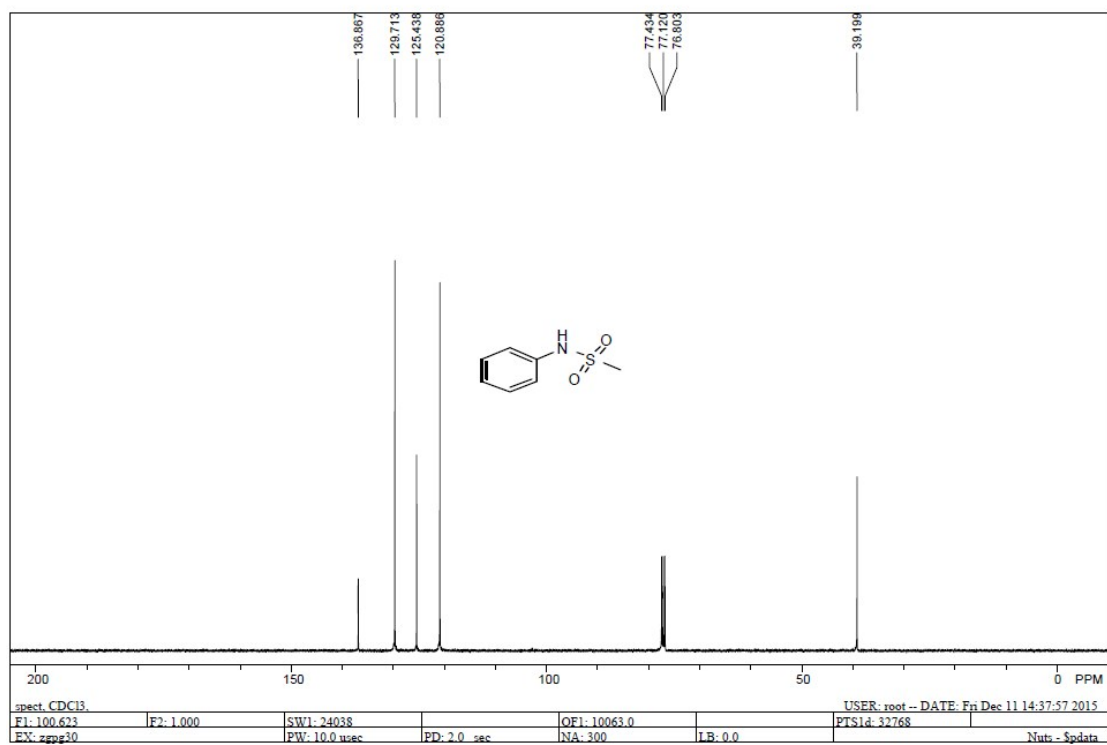

<sup>1</sup>H NMR and <sup>13</sup>C NMR spectra of compound **3p**

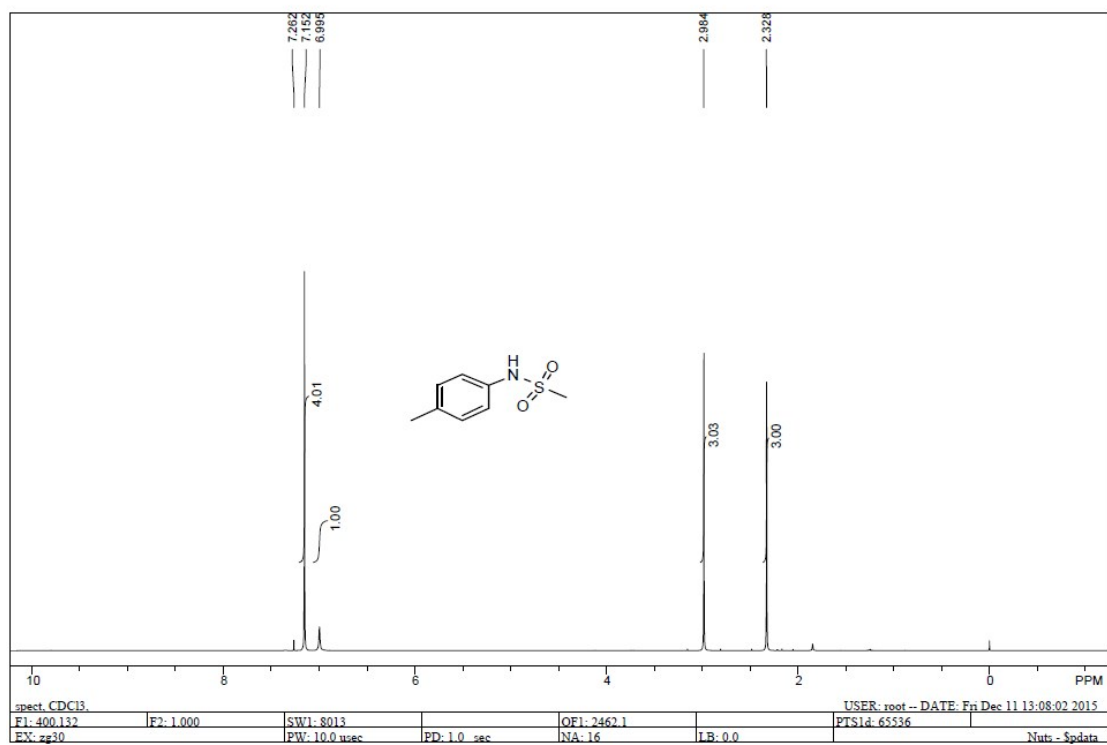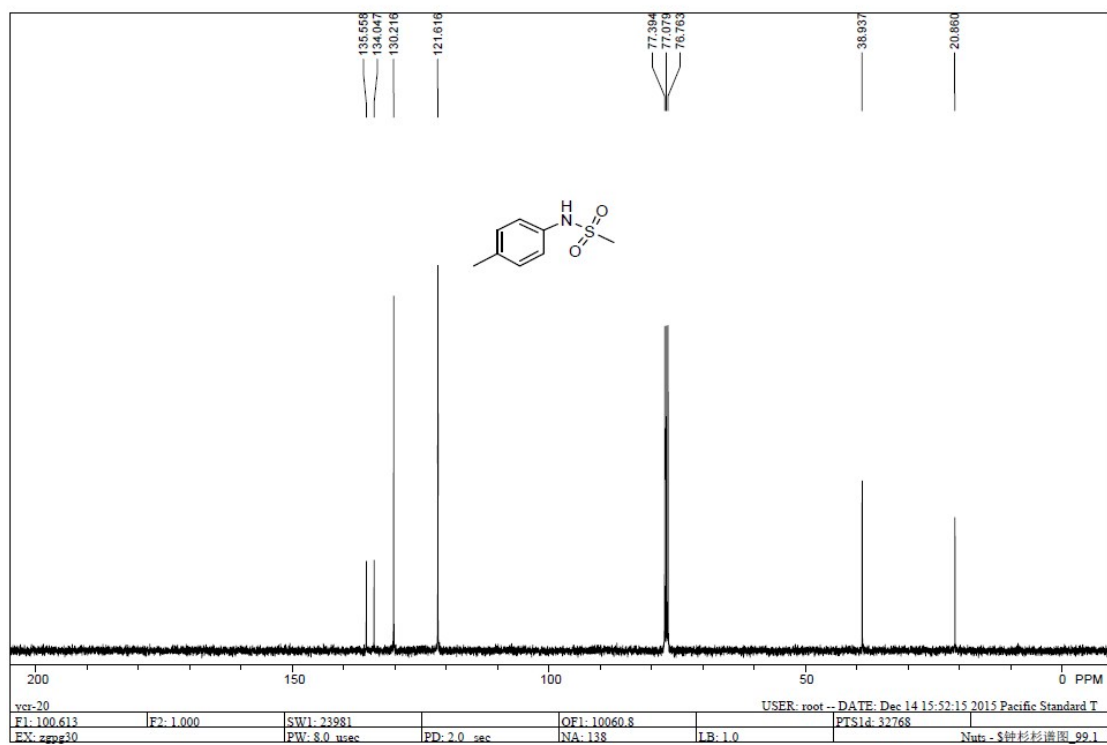

$^1\text{H}$  NMR and  $^{13}\text{C}$  NMR spectra of compound **3q**

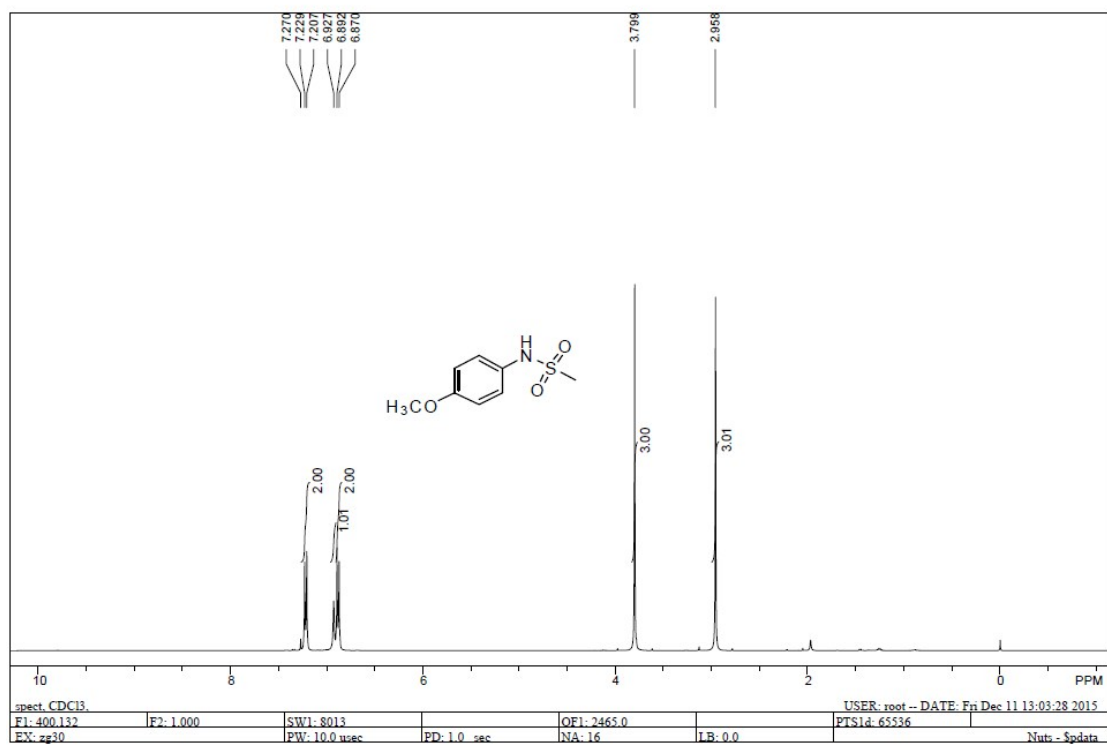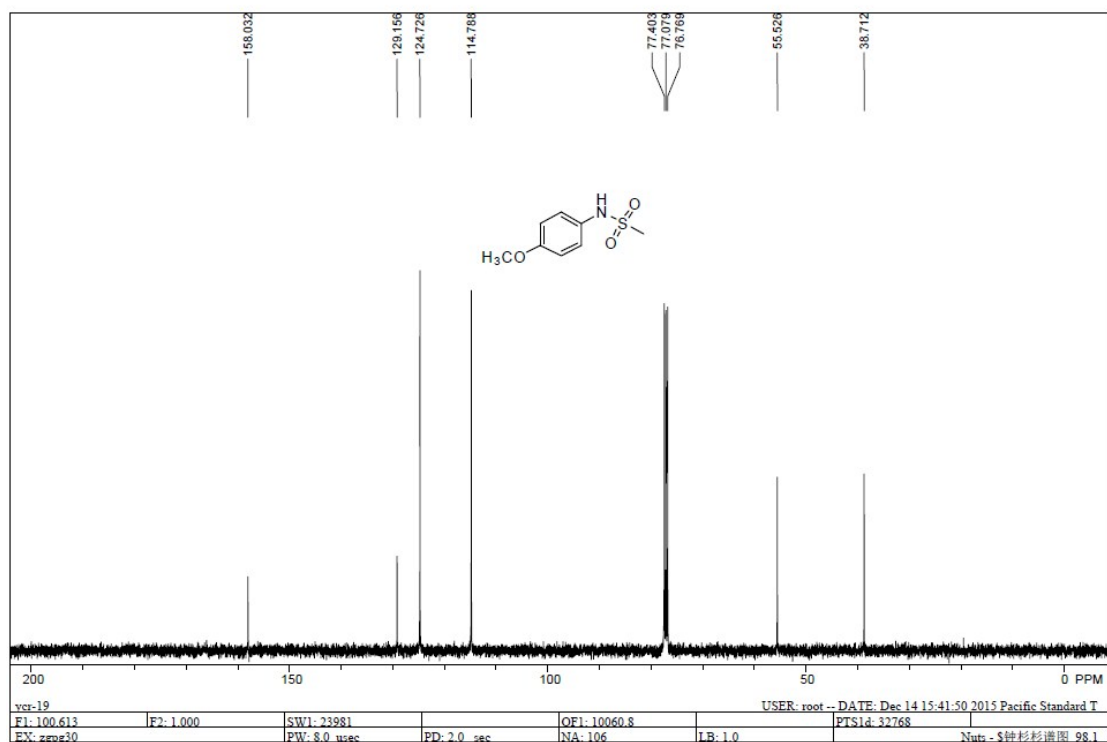

$^1\text{H}$  NMR and  $^{13}\text{C}$  NMR spectra of compound **3r**

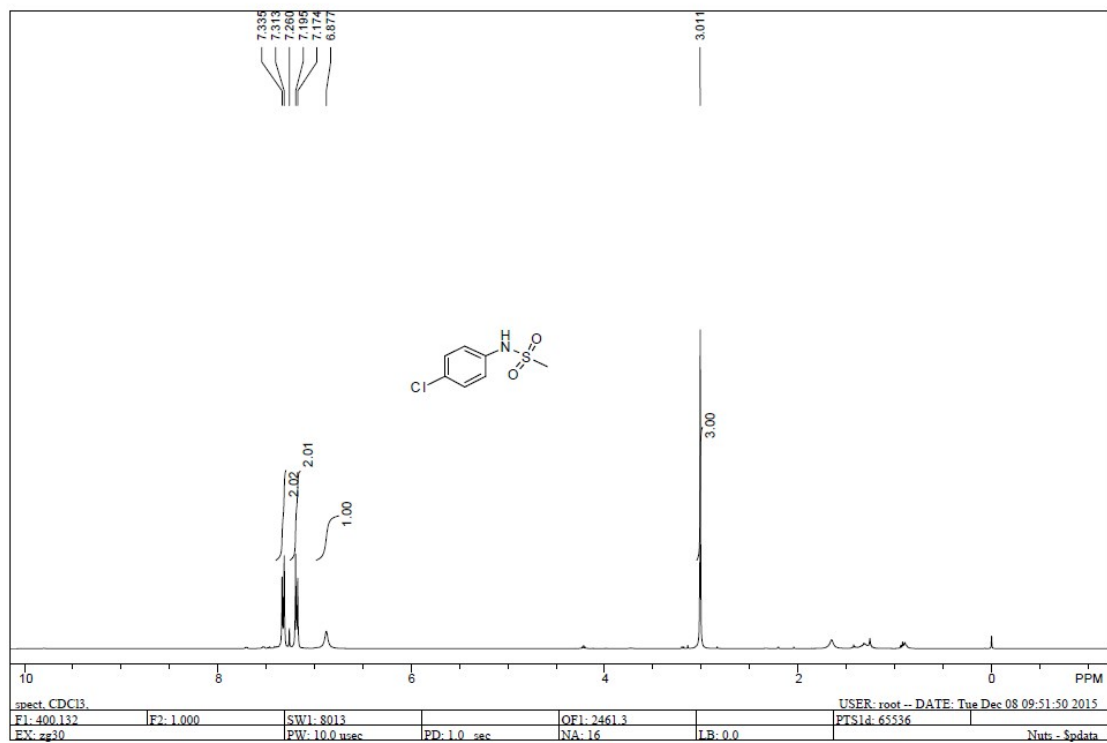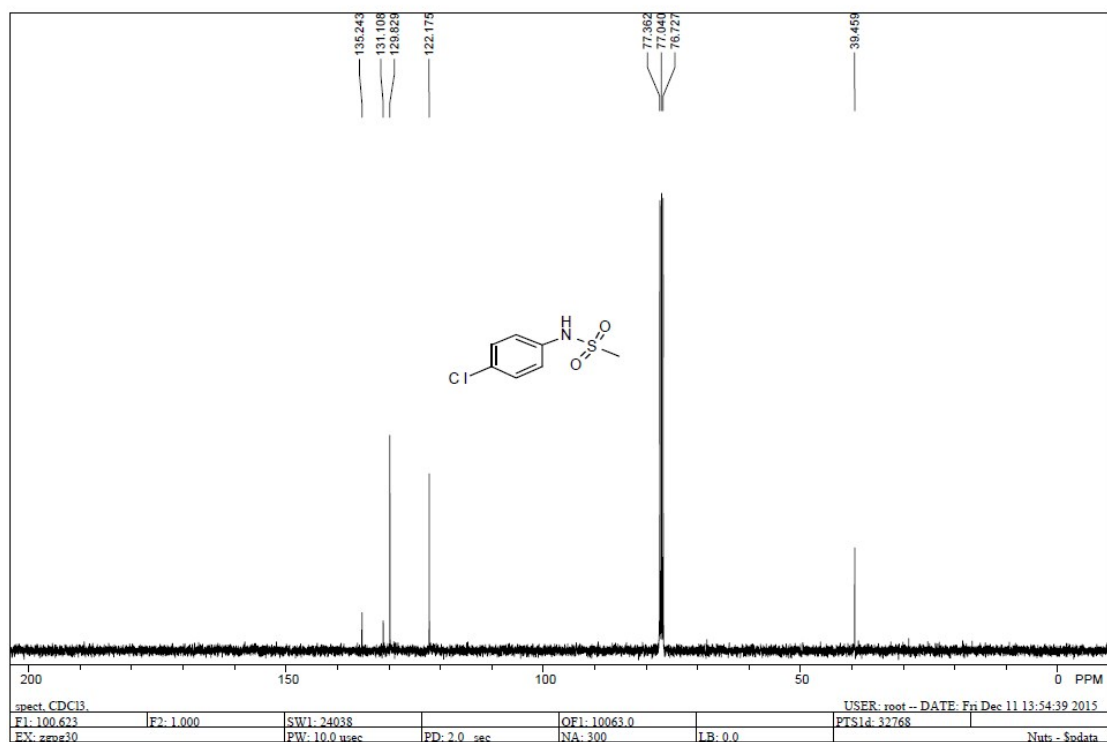

$^1\text{H}$  NMR and  $^{13}\text{C}$  NMR spectra of compound **3s**

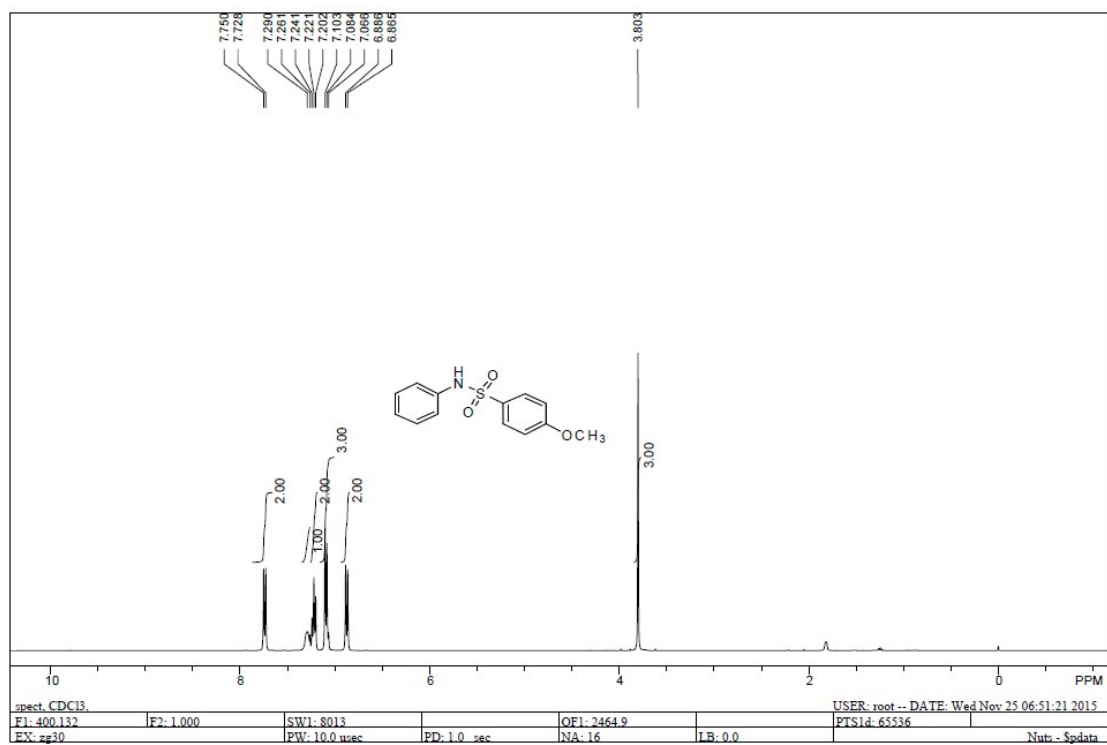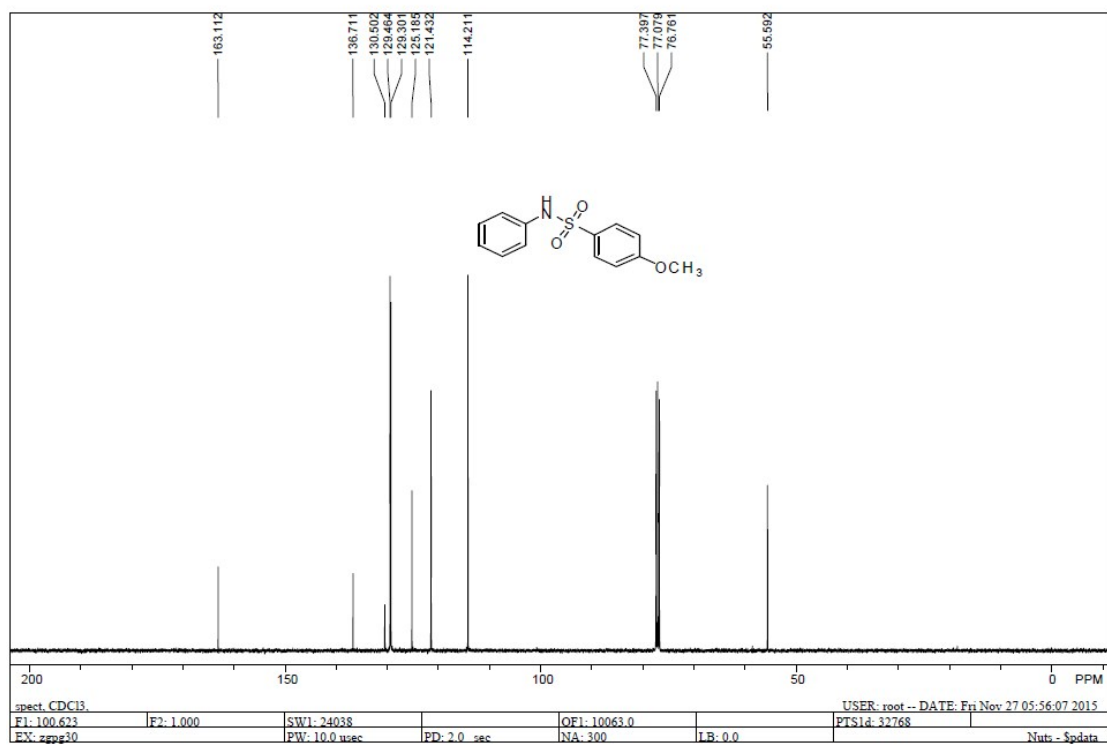

<sup>1</sup>H NMR and <sup>13</sup>C NMR spectra of compound 3t

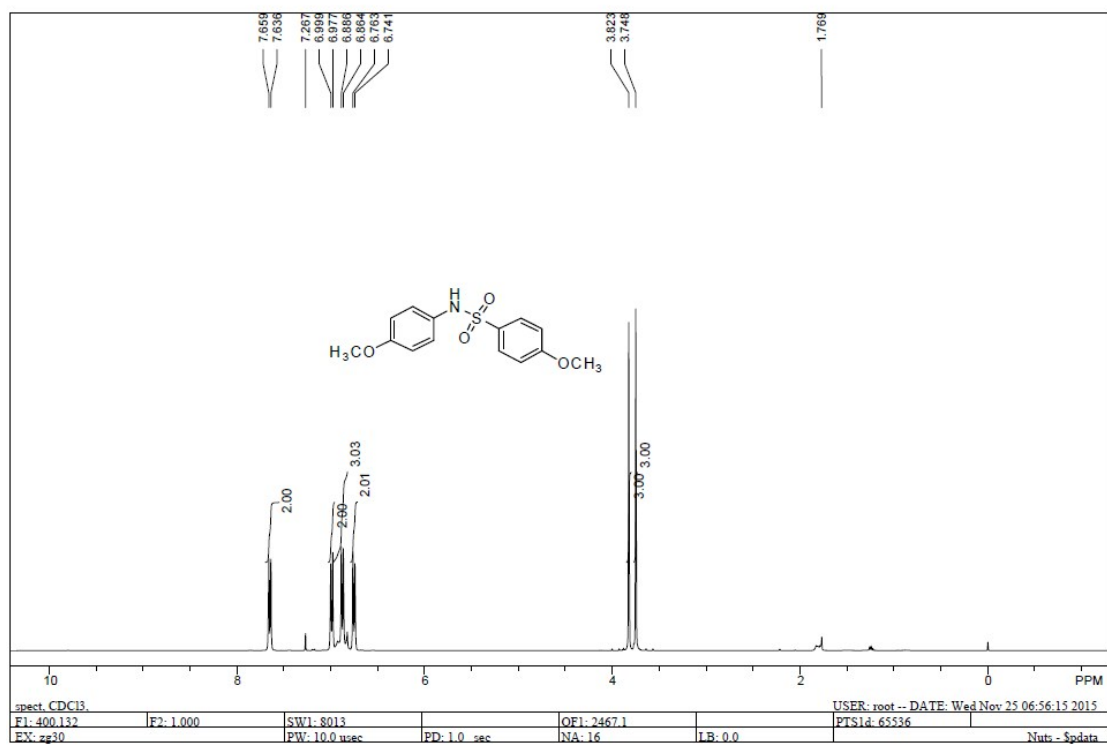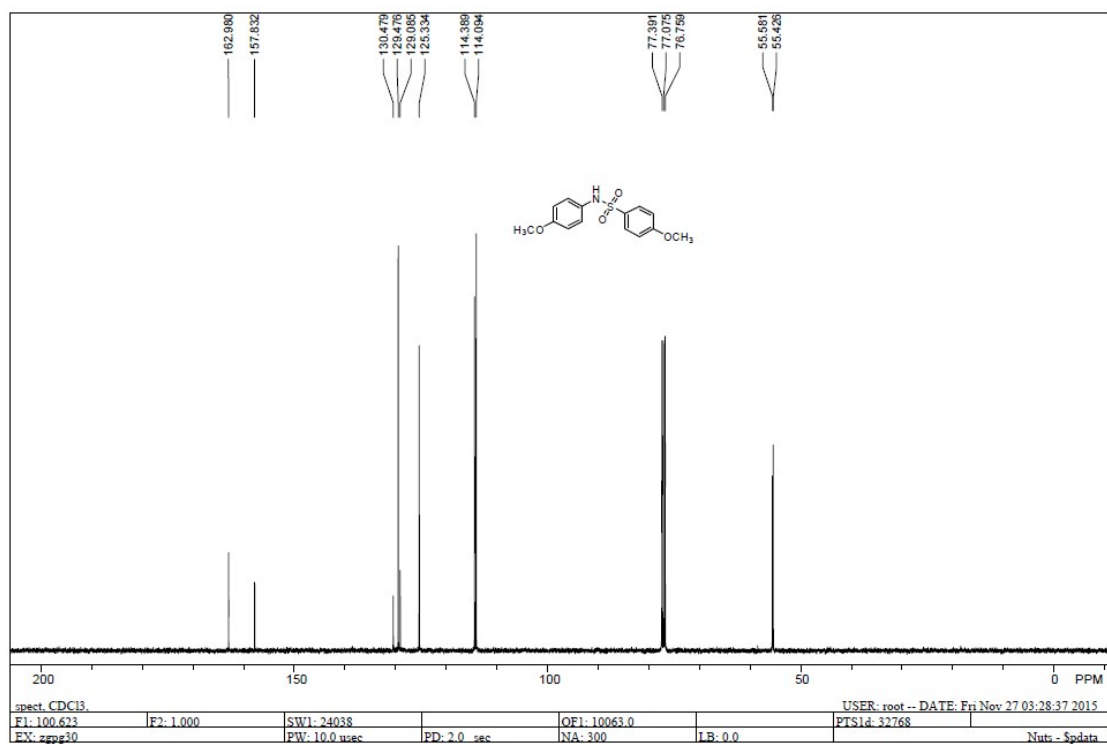

<sup>1</sup>H NMR and <sup>13</sup>C NMR spectra of compound **3u**

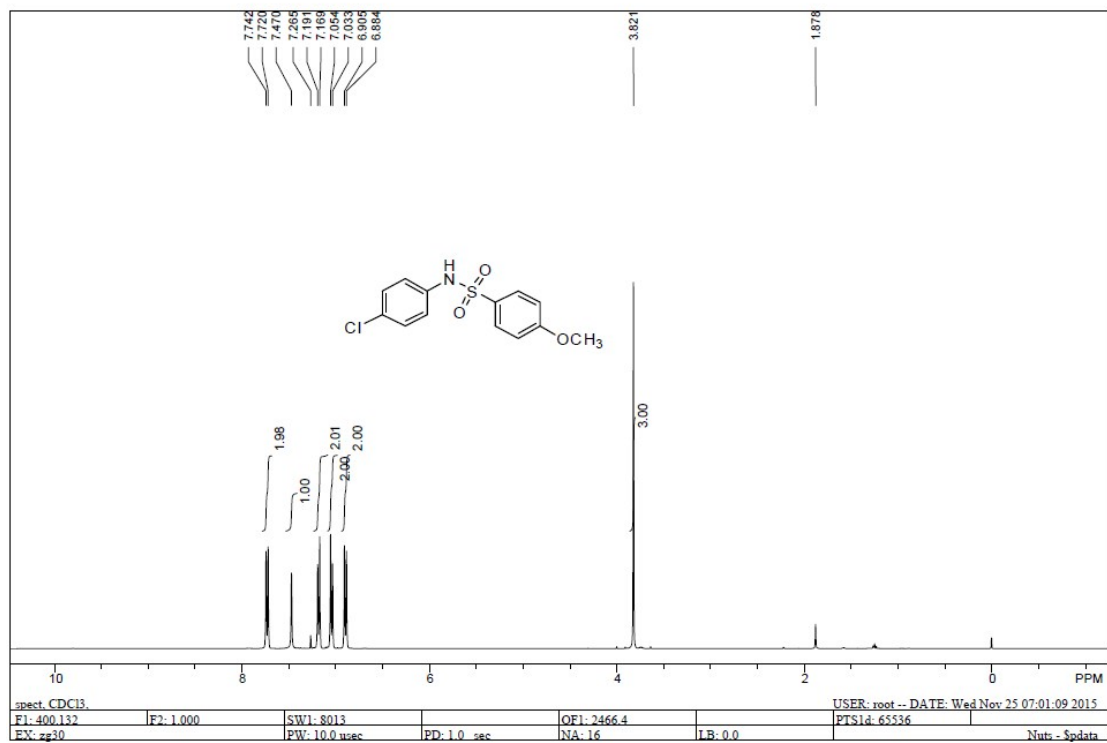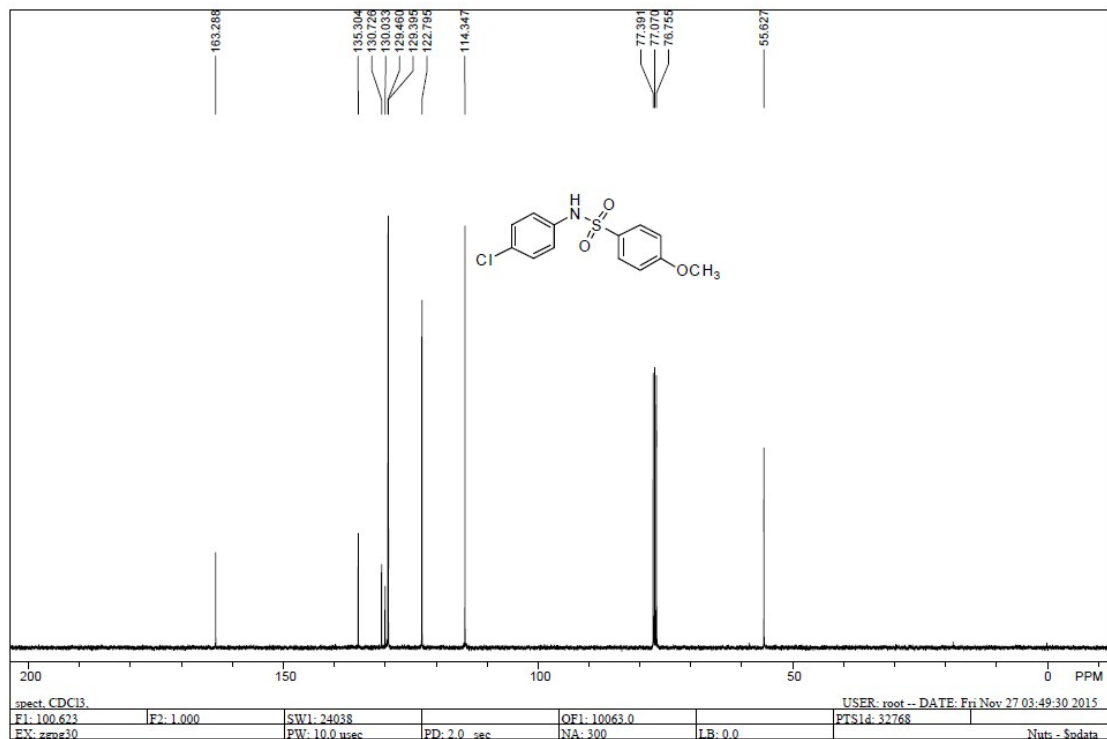

<sup>1</sup>H NMR and <sup>13</sup>C NMR spectra of compound **3v**



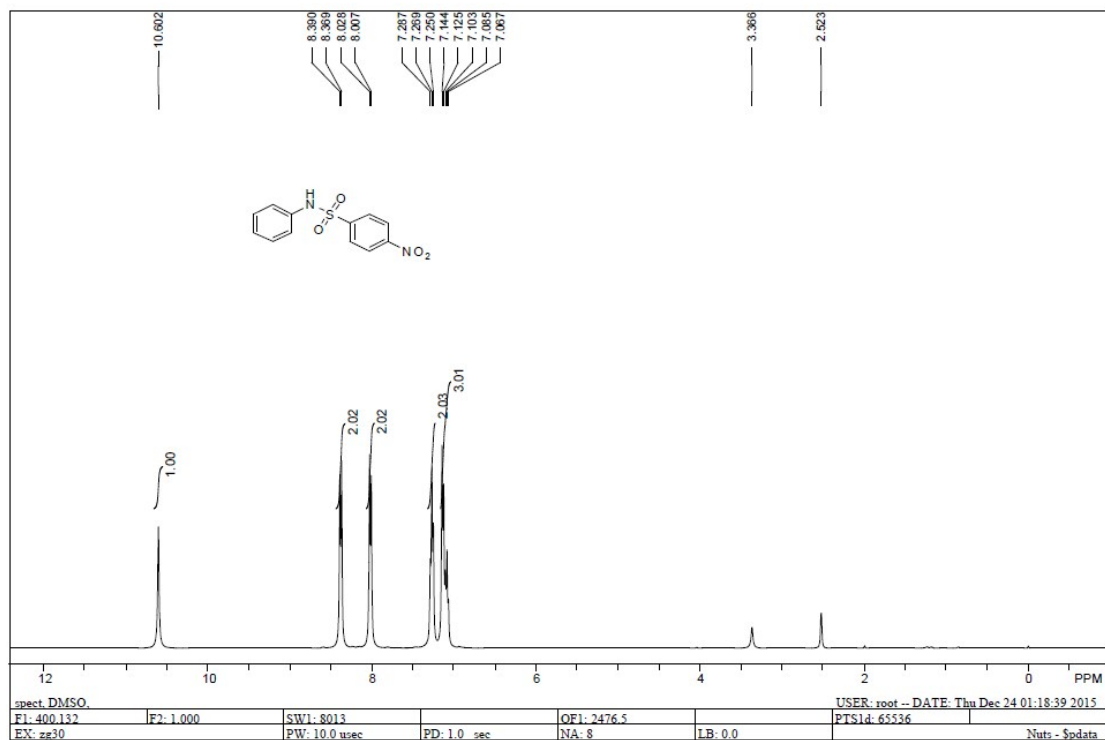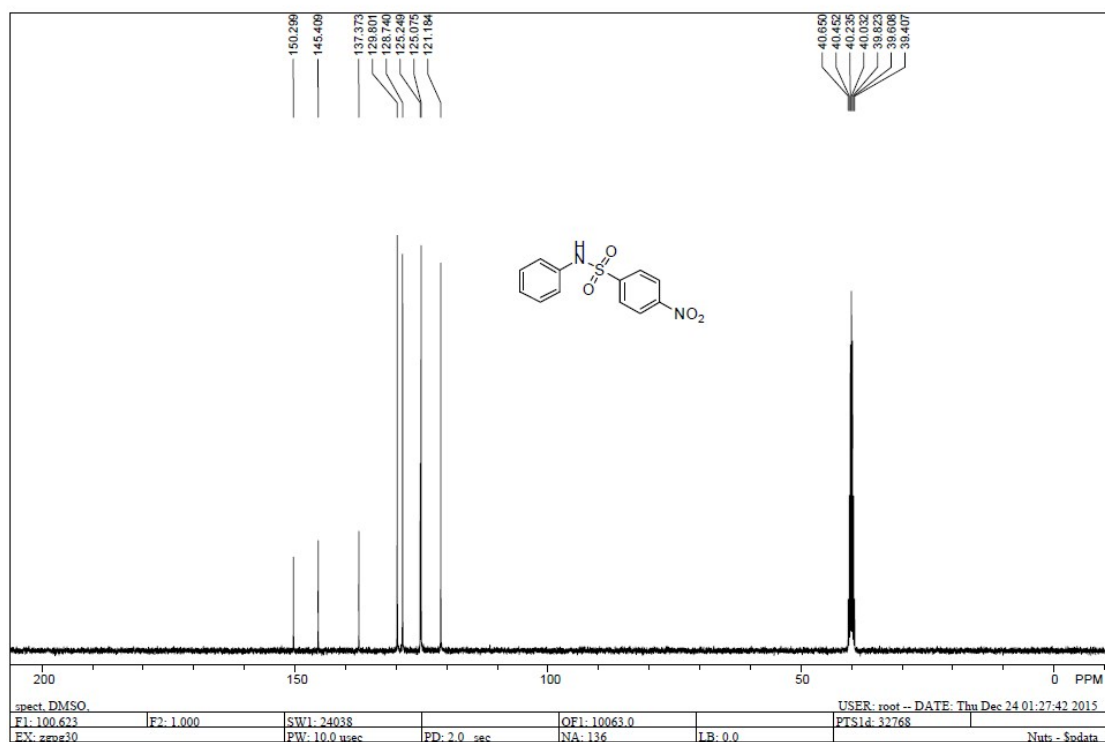

<sup>1</sup>H NMR and <sup>13</sup>C NMR spectra of compound **3w**

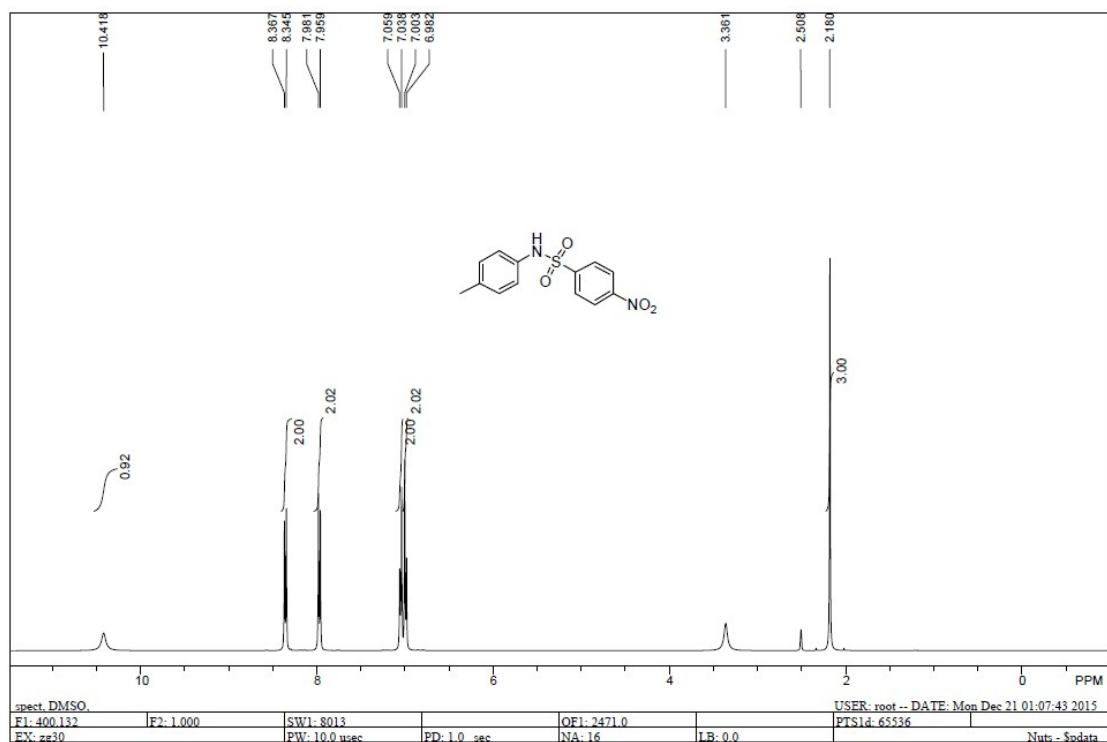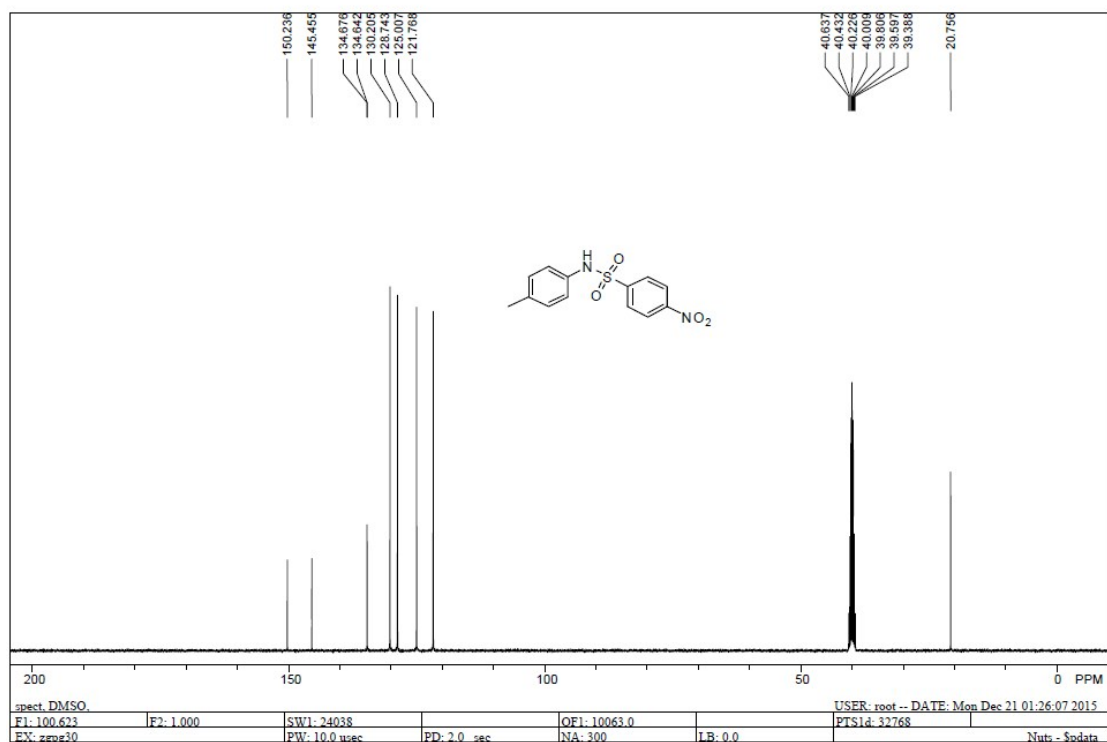

<sup>1</sup>H NMR and <sup>13</sup>C NMR spectra of compound **3x**

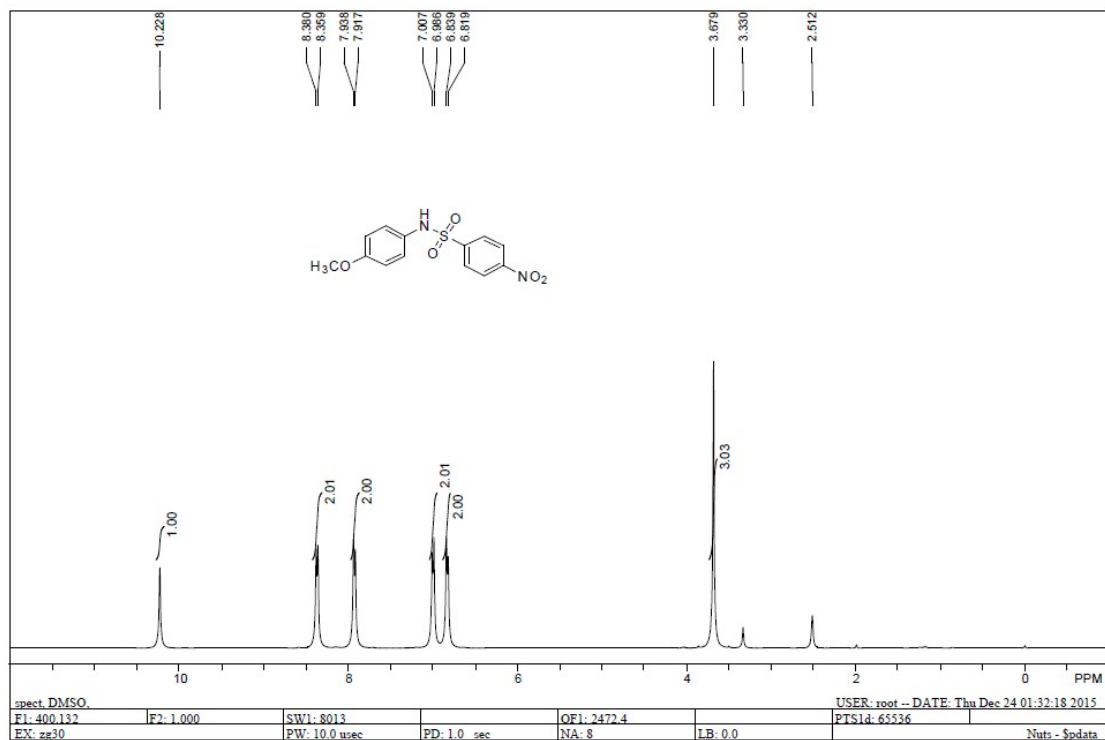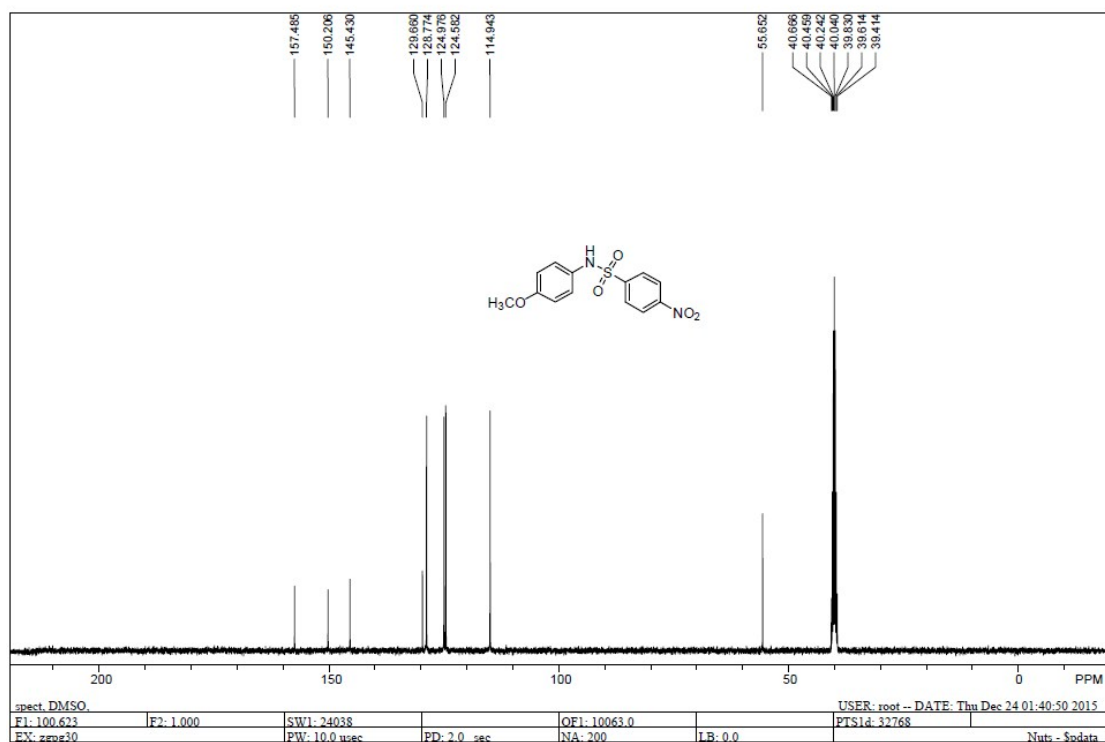

$^1\text{H}$  NMR and  $^{13}\text{C}$  NMR spectra of compound **3y**

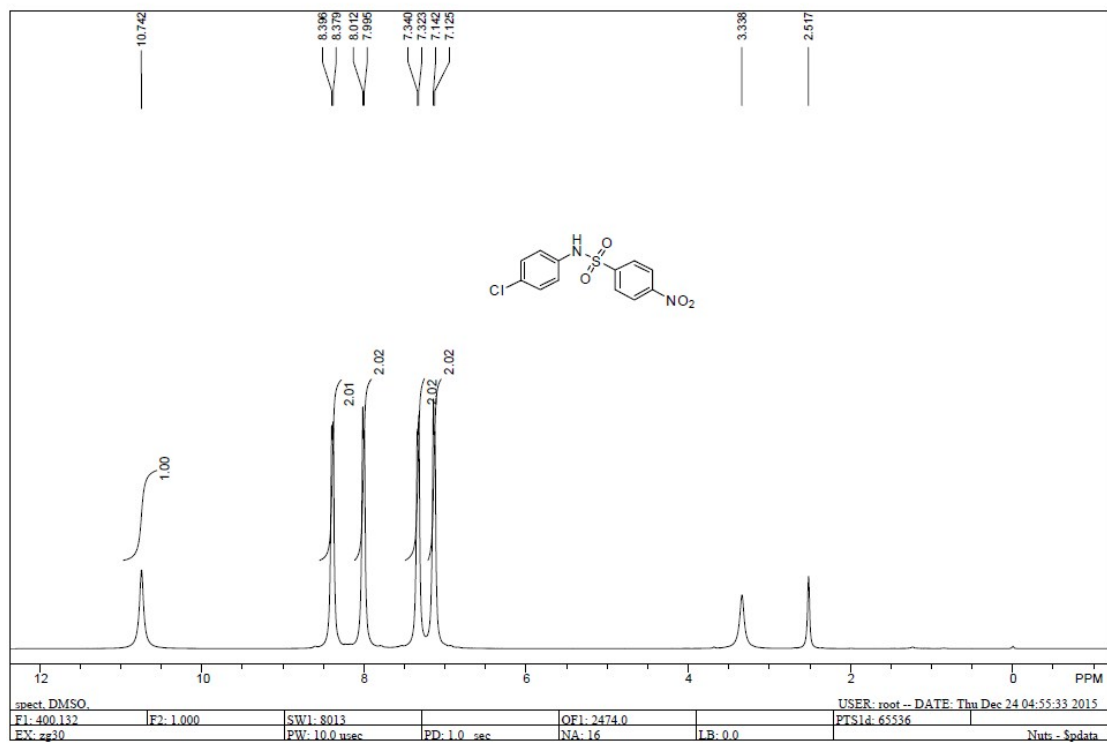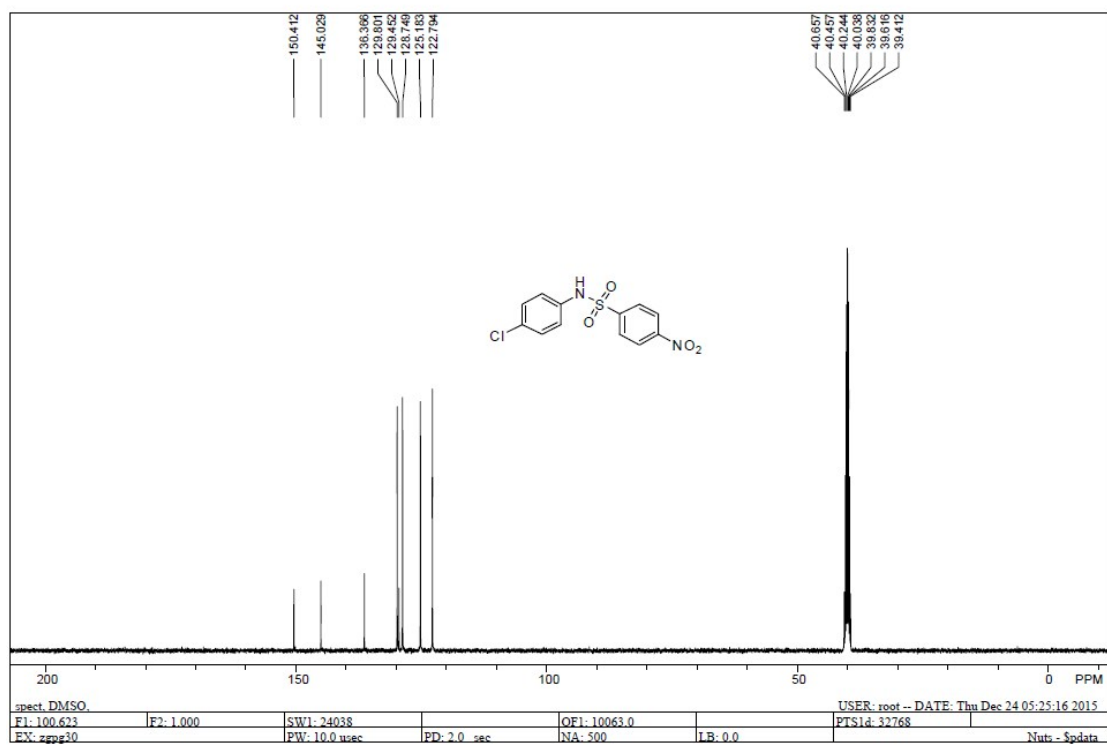

$^1\text{H}$  NMR and  $^{13}\text{C}$  NMR spectra of compound **3z**

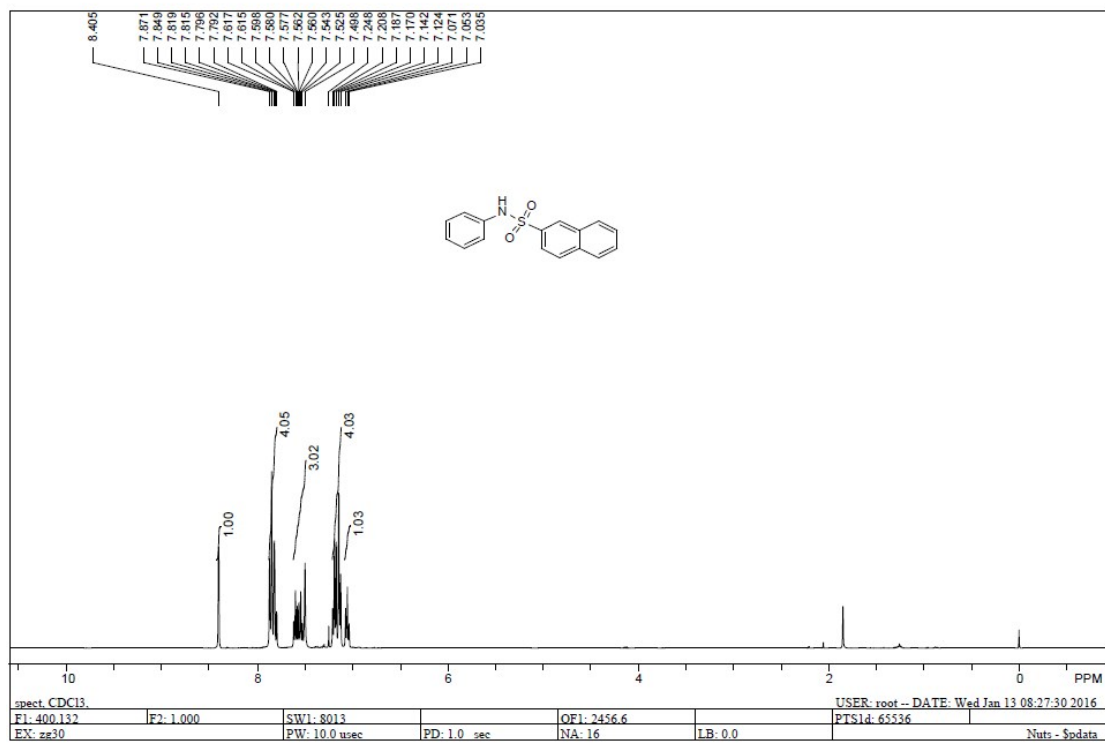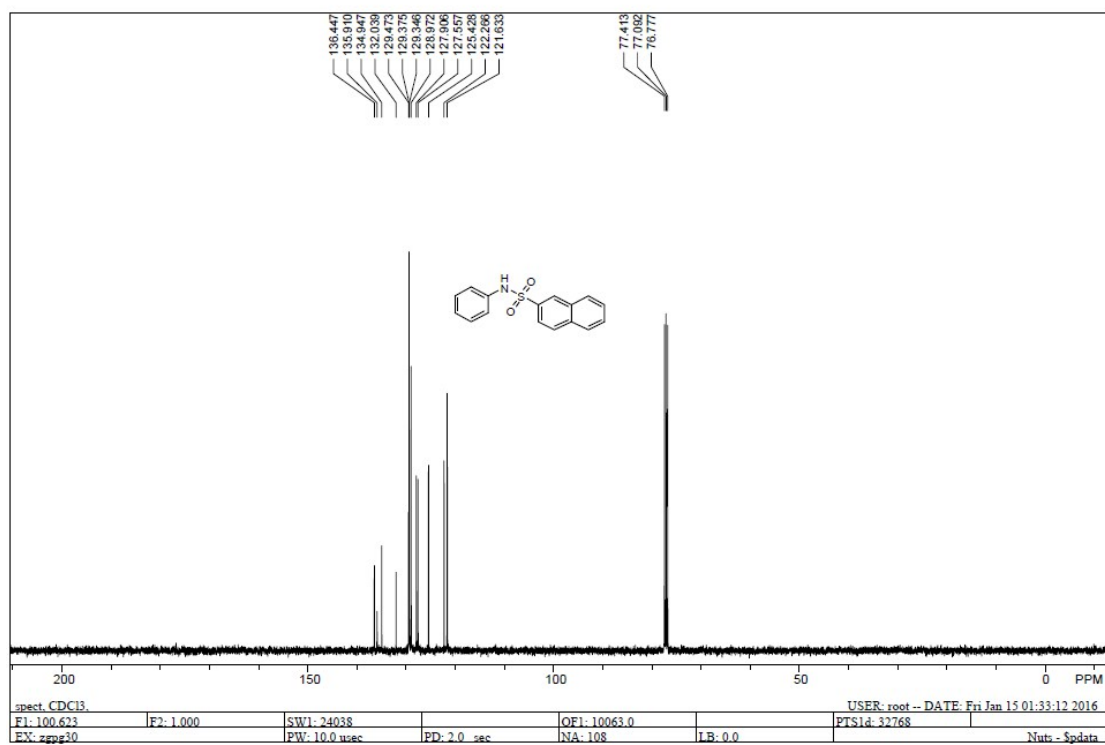

<sup>1</sup>H NMR and <sup>13</sup>C NMR spectra of compound 3a'

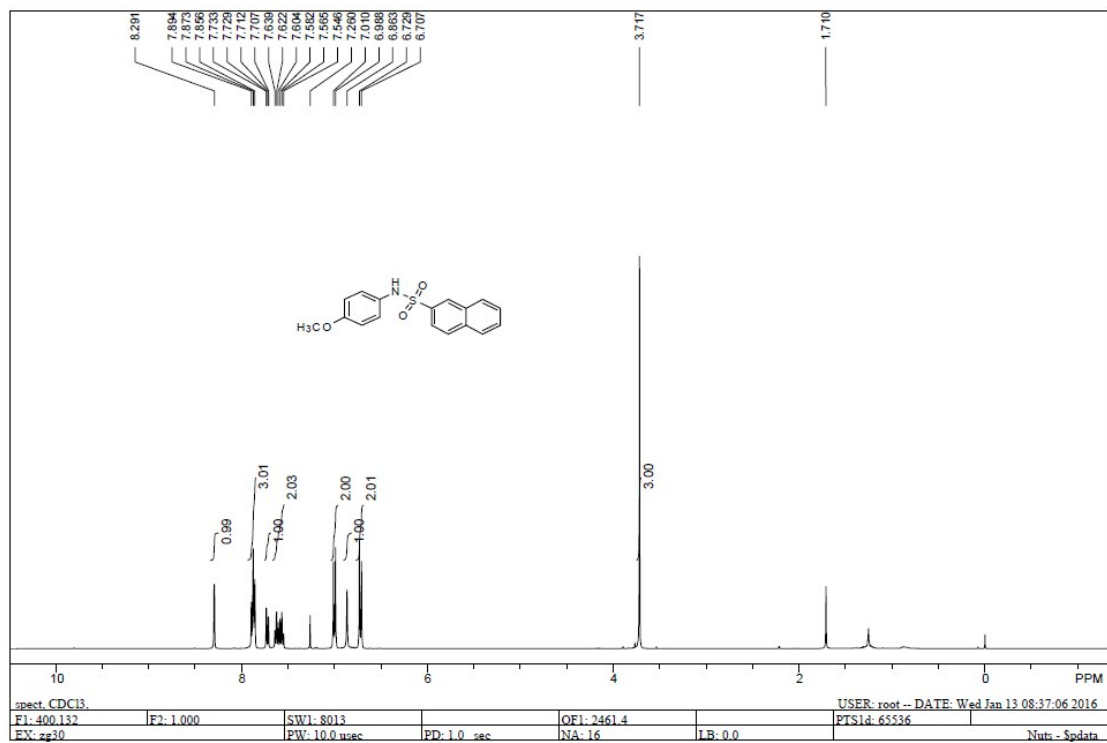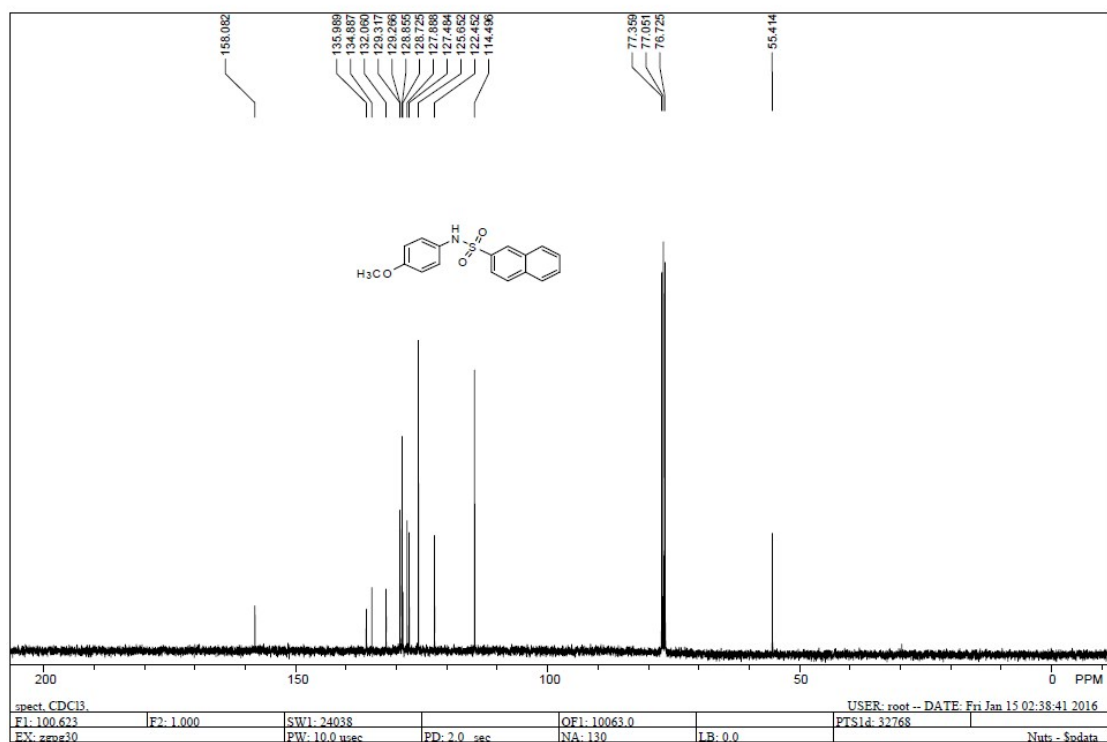

<sup>1</sup>H NMR and <sup>13</sup>C NMR spectra of compound **3b'**

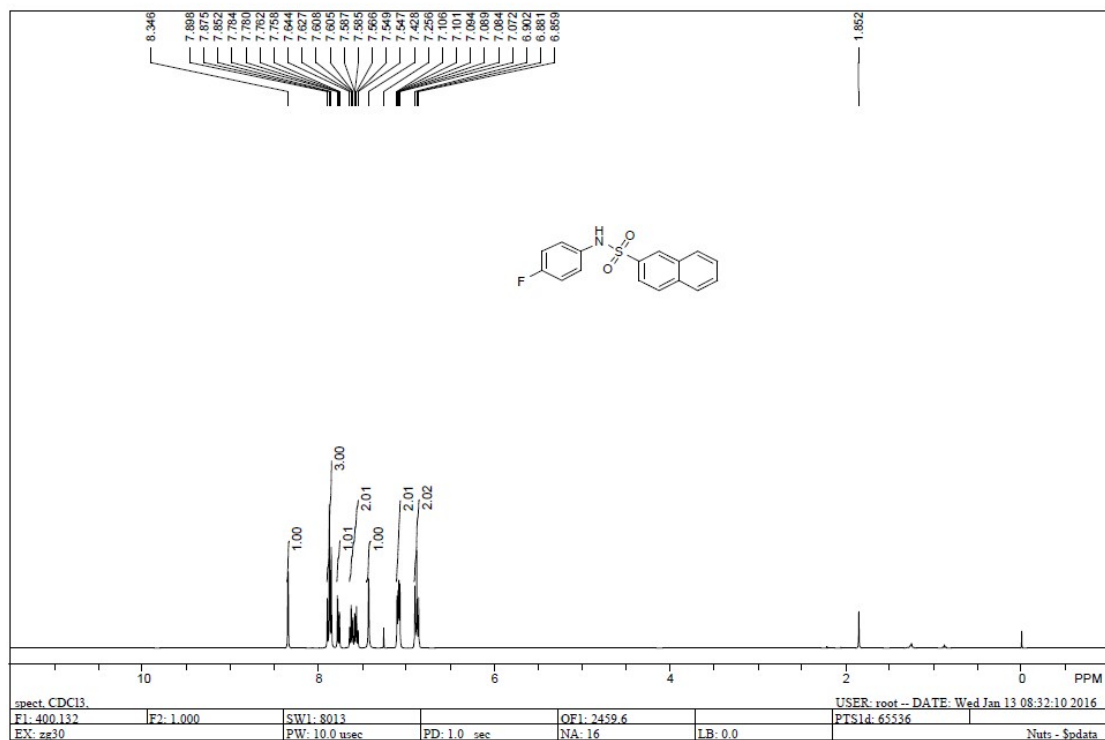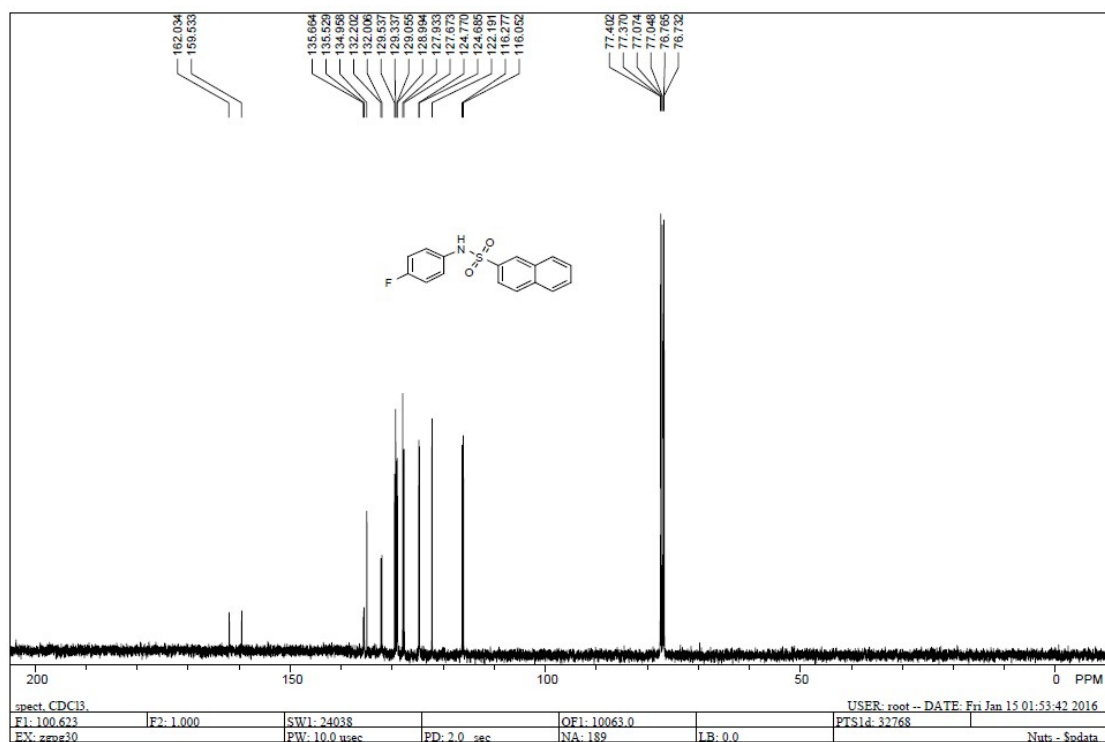

<sup>1</sup>H NMR and <sup>13</sup>C NMR spectra of compound 3c'

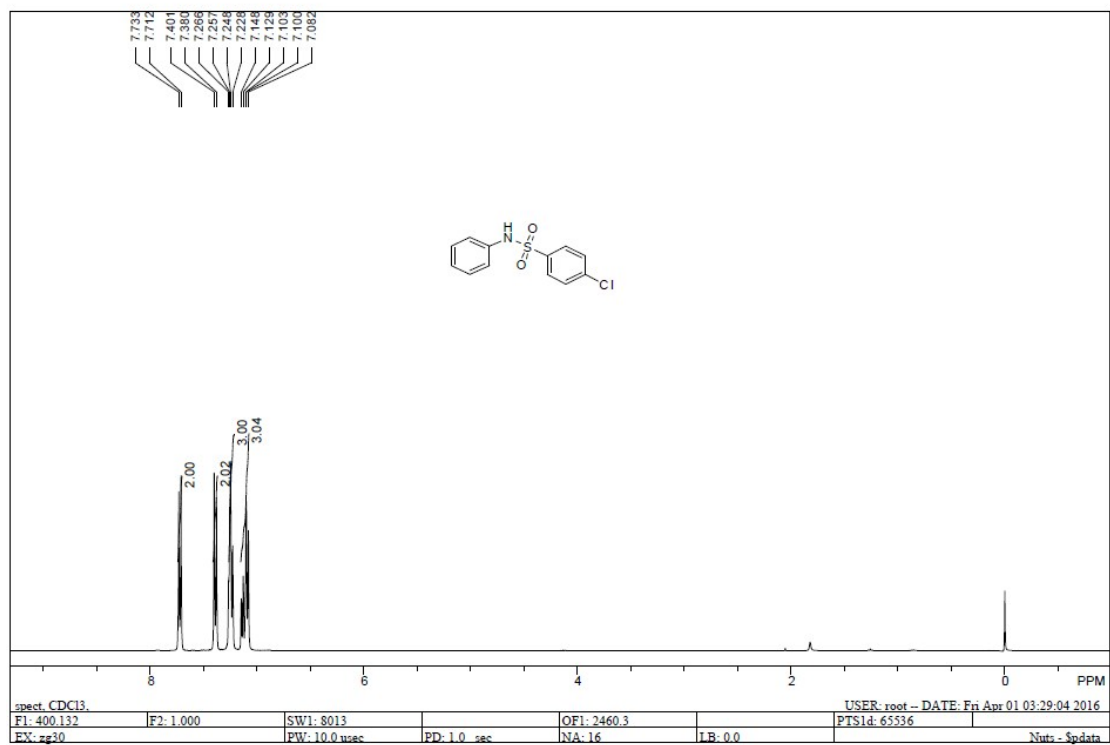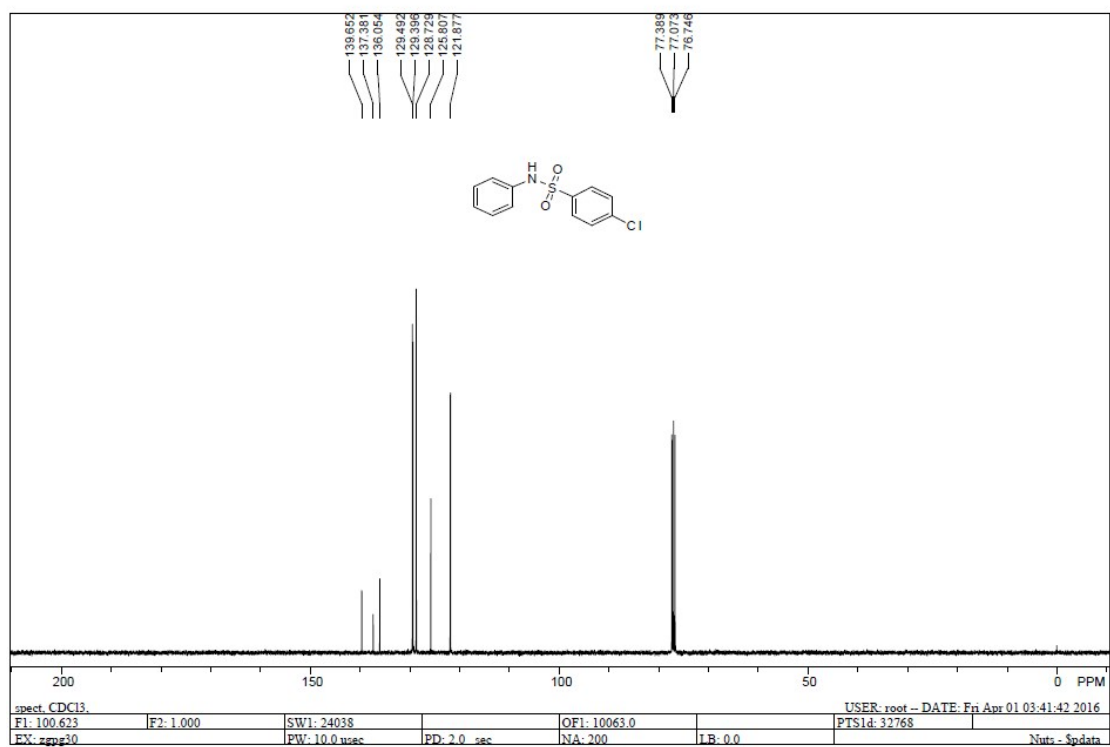

$^1\text{H}$  NMR and  $^{13}\text{C}$  NMR spectra of compound **3d'**



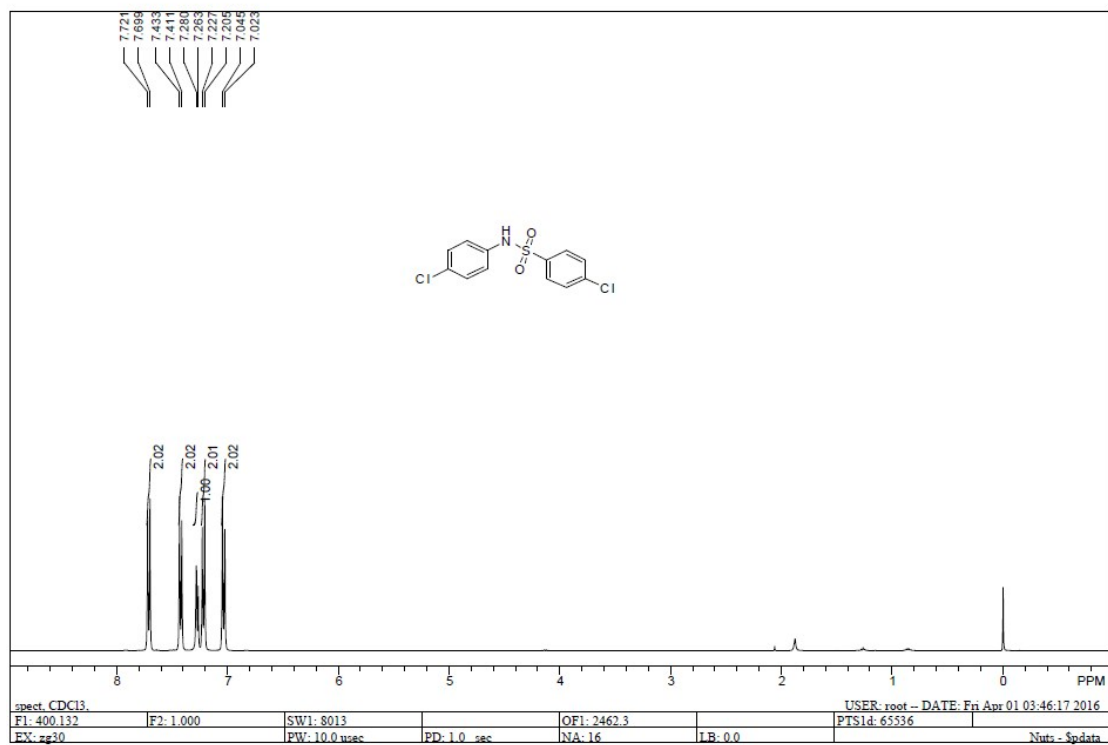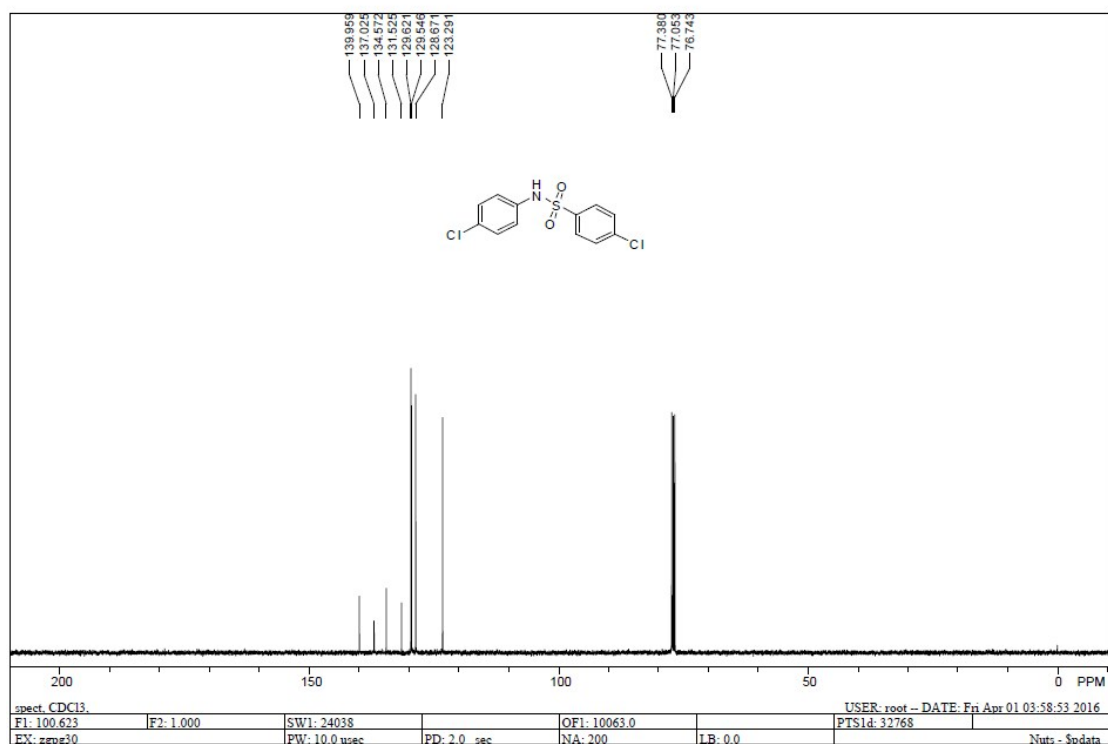

<sup>1</sup>H NMR and <sup>13</sup>C NMR spectra of compound 3e'

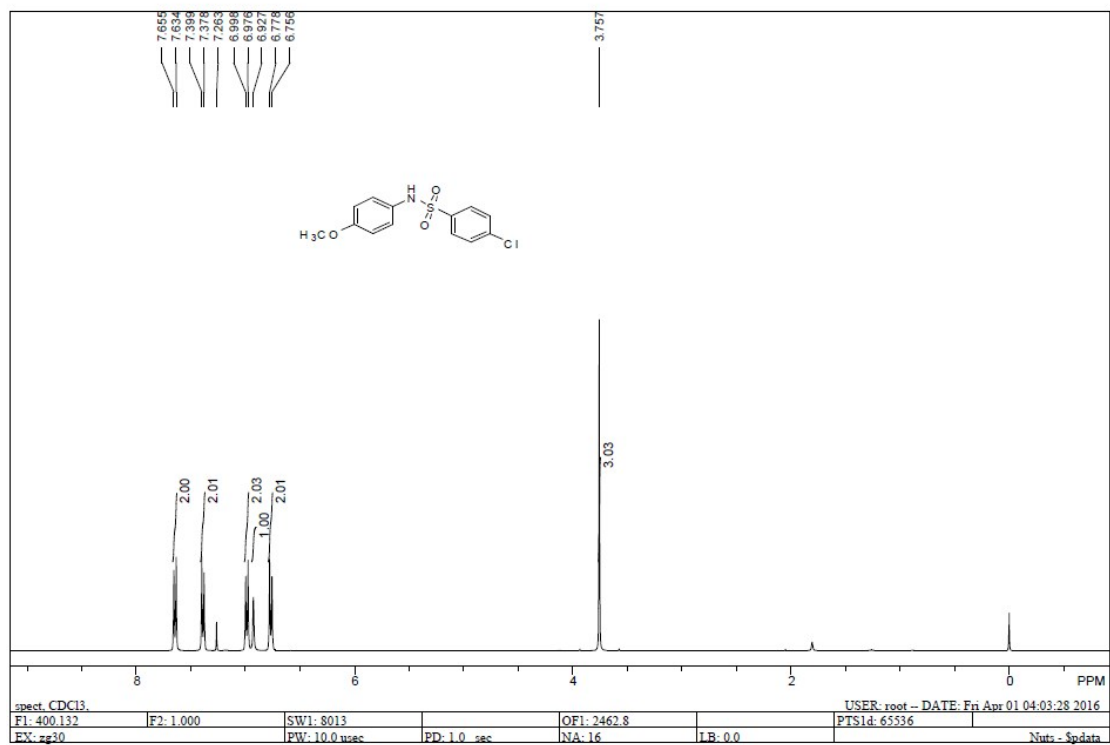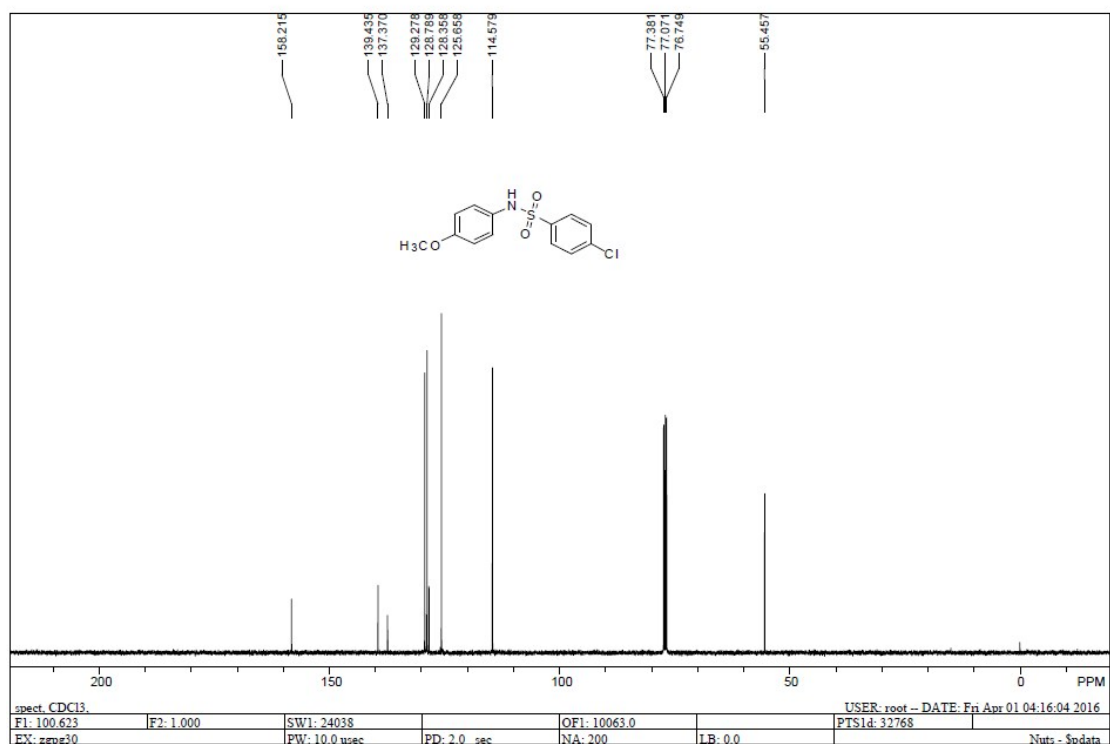

<sup>1</sup>H NMR and <sup>13</sup>C NMR spectra of compound 3f

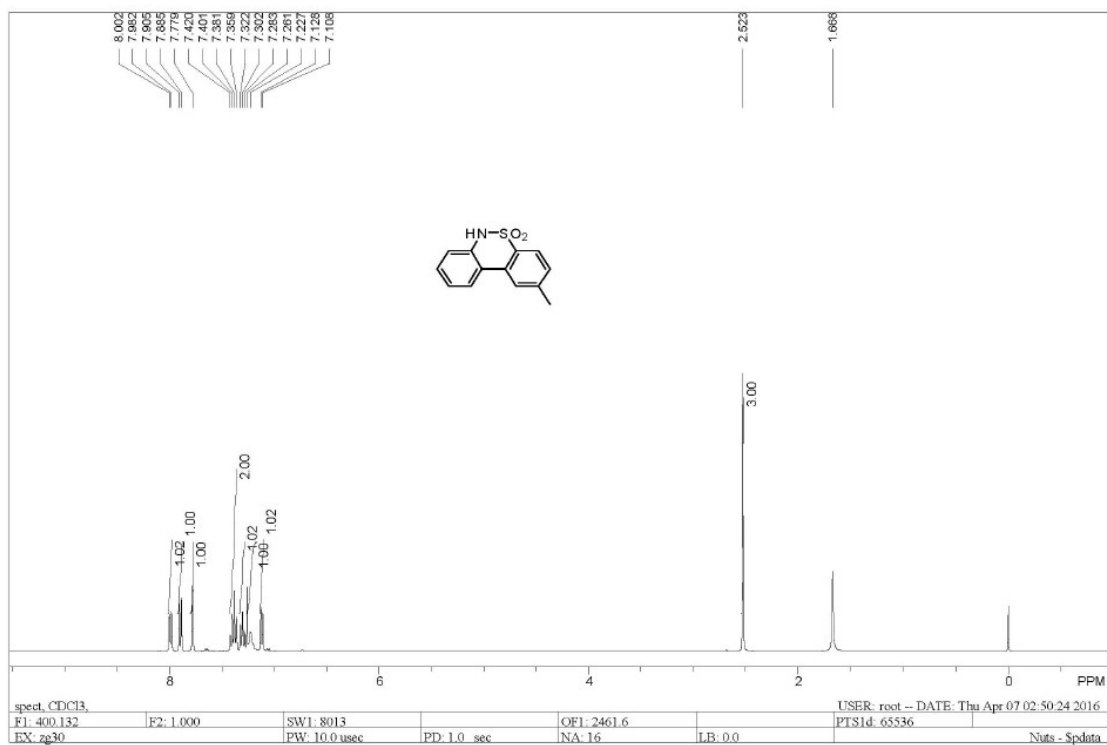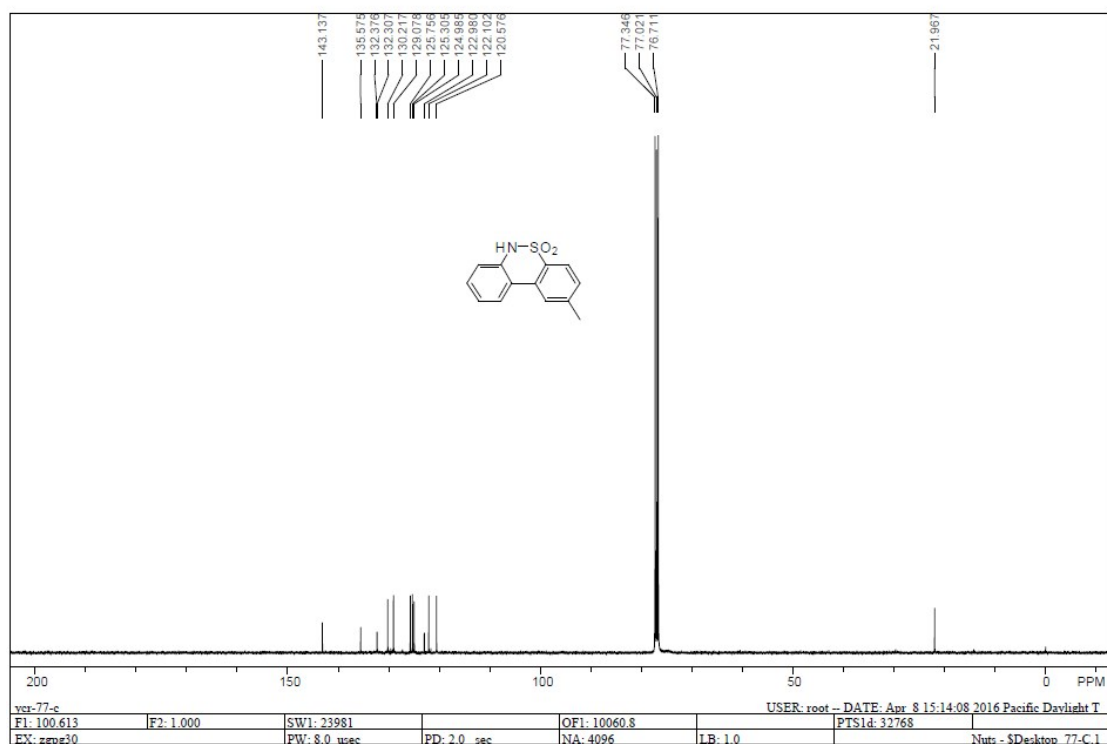

<sup>1</sup>H NMR and <sup>13</sup>C NMR spectra of compound 4a
